1 **Formation of tRNA wobble inosine in humans is perturbed by a millennia-old mutation linked to**  
2 **intellectual disability**

3

4 Jillian Ramos<sup>1,2</sup>, Lu Han<sup>2,3</sup>, Yan Li<sup>1,2</sup>, Fowzan S. Alkuraya<sup>4,5</sup>, Eric M. Phizicky<sup>2,3</sup> and Dragony Fu<sup>1,2,\*</sup>

5

6 <sup>1</sup>Department of Biology, University of Rochester, <sup>2</sup>Center for RNA Biology, <sup>3</sup>Department of  
7 Biochemistry and Biophysics, University of Rochester Medical Center, <sup>4</sup>Department of Genetics, King  
8 Faisal Specialist Hospital and Research Center, Riyadh, Saudi Arabia, <sup>5</sup>Department of Anatomy and Cell  
9 Biology, College of Medicine, Alfaisal University, Riyadh, Saudi Arabia

10

11 \* Corresponding author: [dragonyfu@rochester.edu](mailto:dragonyfu@rochester.edu)

## 12 **Abstract**

13 The formation of inosine at the wobble position of eukaryotic tRNAs is an essential modification catalyzed  
14 by the ADAT2/ADAT3 complex. In humans, a valine to methionine mutation (V144M) in ADAT3 that  
15 originated ~1,600 years ago is the most common cause of autosomal-recessive intellectual disability (ID)  
16 in Arabia. Here, we show that ADAT3-V144M exhibits perturbations in subcellular localization and has  
17 increased propensity to form aggregates associated with cytoplasmic chaperonins. While ADAT2 co-  
18 expression can suppress the aggregation of ADAT3-V144M, the ADAT2/3 complexes assembled with  
19 ADAT3-V144M exhibit defects in adenosine deaminase activity. Moreover, extracts from cell lines derived  
20 from ID-affected individuals expressing only ADAT3-V144M display a reduction in tRNA deaminase  
21 activity. Notably, we find that the same cell lines from ID-affected individuals exhibit decreased wobble  
22 inosine in certain tRNAs. These results identify a role for ADAT2-dependent localization and folding of  
23 ADAT3 in wobble inosine modification that is crucial for the developing human brain.

24

## 25 **Introduction**

26 The hydrolytic deamination of adenosine (A) to inosine (I) at the wobble position of tRNA is an  
27 essential post-transcriptional tRNA modification in bacteria and eukaryotes (reviewed in (1-3). Since  
28 inosine can pair with U, C or A, a single tRNA isoacceptor containing the inosine modification at the  
29 wobble anticodon position can recognize up to three different codons containing a different nucleotide base  
30 at the third position. Thus, the degeneracy provided by the wobble inosine modification is necessary for the  
31 translation of C or A-ending codons in organisms that lack a cognate G or U<sub>34</sub>-containing anticodon tRNA  
32 isoacceptor by expanding the reading capacity of tRNA isoacceptors (4). Moreover, it has been shown that  
33 highly translated genes in eukaryotic organisms, including humans, are correlated with an enrichment in  
34 wobble inosine tRNA-dependent codons, suggesting a critical role for tRNA inosine modification in  
35 maintaining proper levels of protein expression (5,6).

36 In *Escherichia coli*, A to I conversion at the wobble position is present in a single tRNA (tRNA-  
37 Arg-ACG); and is catalyzed by the homodimeric complex TadA adenosine deaminase (7). In the yeast

38 *Saccharomyces cerevisiae*, wobble inosine modification occurs in seven different tRNAs and is catalyzed  
39 by a heterodimeric enzyme complex consisting of the Tad2p and Tad3p subunits (8,9). Tad2p is the catalytic  
40 subunit and contains a prototypical deaminase motif homologous to cytidine/deoxycytidine deaminases,  
41 including a conserved glutamic acid residue within the active site that is necessary for proton shuttling in  
42 the hydrolytic deamination reaction (10,11). Tad3p also contains a canonical deaminase motif but lacks the  
43 conserved catalytic glutamate in the active site. However, Tad2p is inactive without Tad3p, indicating that  
44 formation of a heterodimeric Tad2p/Tad3p complex is required for adenosine deaminase activity (8).  
45 Functional homologs of *S. cerevisiae* Tad2p and Tad3p have been identified in all eukaryotes to date,  
46 including the human homologs ADAT2 and ADAT3 (12-15).

47 Exome sequencing and autozygosity mapping have identified a single c.382G>A mutation in the  
48 human *ADAT3* gene that is causative for autosomal-recessive intellectual disability (ID) in multiple families  
49 of Saudi Arabian descent (16,17). All reported individuals homozygous for the V144M mutation exhibit  
50 cognitive deficits indicative of a neurodevelopmental disorder, with the majority displaying strabismus and  
51 growth delay. Additional clinical features of individuals homozygous for the ADAT3-V144M mutation  
52 include microcephaly, epilepsy, and occasional brain abnormalities such as white matter atrophy and  
53 arachnoid cysts. Subsequent large-scale sequencing has identified this ancient founder mutation to be one  
54 of the most common causes of autosomal recessive intellectual disability in patients from Saudi Arabia,  
55 with a carrier frequency of ~1% (18-20). However, the mechanistic cause of ADAT3-associated  
56 pathogenesis remains unclear.

57 Based upon the longer of two mRNA transcripts encoded by the human *ADAT3* gene, the ID-  
58 causing G>A transition results in a valine to methionine missense mutation at residue 144 (V144M) of the  
59 encoded ADAT3 protein. The mutated valine residue is conserved from yeast to humans and is predicted  
60 to perturb the surface structure of the ADAT3 protein (16). However, it is unknown how the V144M  
61 mutation affects ADAT3 function and whether this would affect tRNA inosine modification levels in ID-  
62 affected individuals that are homozygous for the autosomal-recessive mutation. This would be important

63 to test given the increasing awareness of tRNA modification in the etiology of other forms of Mendelian  
64 ID (21-30).

65 Here, we use subcellular localization studies combined with proteomics to find that ADAT3-  
66 V144M exhibits aberrant aggregation into cytoplasmic foci accompanied by targeting by chaperonin  
67 complexes HSP60 and TRiC/CCT. Interestingly, the aggregation phenotype of ADAT3-V144M along with  
68 its association with chaperonins can be suppressed by co-expression with ADAT2. Moreover, we find that  
69 purified ADAT2/3 complexes assembled with ADAT3-V144M display severe defects in adenosine  
70 deaminase activity on a known tRNA substrate. Most strikingly, we find that cells isolated from ID-affected  
71 individuals homozygous for the ADAT3-V144M mutation contain diminished levels of wobble inosine in  
72 several tRNA isoacceptors and extracts from these cells exhibit a drastic decrease in adenosine deaminase  
73 activity. Altogether, these results uncover a molecular basis for ADAT3-associated neurodevelopmental  
74 disorders in the form of diminished inosine modifications at the wobble position of tRNA caused by  
75 aberrant localization of the ADAT2/3 adenosine deaminase complex combined with defects in enzymatic  
76 activity.

77

## 78 **RESULTS**

### 79 **ADAT3-V144M displays aberrant subcellular localization and increased susceptibility to form** 80 **cytoplasmic aggregates**

81 While the ID-associated V144M mutation is predicted to affect protein structure, it is unknown if  
82 and how the V144M mutation affects the function of ADAT3 in tRNA modification. Since wobble inosine  
83 modification has been proposed to occur at multiple stages of tRNA maturation in the nucleus and  
84 cytoplasm of eukaryotes (14,15,31), we first monitored whether the subcellular localization of ADAT3 was  
85 perturbed by the V144M mutation. The localization of ADAT3 was analyzed by microscopy of HeLa  
86 human cervical carcinoma cells transiently expressing ADAT3 fusion proteins with green-fluorescent  
87 protein at the amino-terminus (GFP-ADAT3). Whereas GFP alone displayed uniform accumulation in both  
88 the cytoplasm and nucleus of HeLa cells (Figure 1A, GFP), the majority of cells expressing GFP-ADAT3-

89 wildtype (WT) exhibited diffuse cytoplasmic localization outlining the nucleus with only a small percentage  
90 of transfected cells exhibiting GFP-ADAT3 signal in the nucleus (Figure 1A, B, GFP-ADAT3-WT). The  
91 absence of nuclear localization for GFP-ADAT3-WT is likely due to the limiting amounts of endogenous  
92 ADAT2 subunit that is required for nuclear import of ADAT3 (15). By contrast, the ADAT3-V144M  
93 variant exhibited a distinct localization pattern with distribution in both the cytoplasm and nucleus rather  
94 than the primarily cytoplasmic localization of ADAT3-WT (Figure 1A, B). In addition to aberrant nuclear  
95 localization, we detected an increased population of GFP-positive cells that exhibited discrete, cytoplasmic  
96 foci when transfected with the ADAT3-V144M variant (Figure 1A, C; GFP-ADAT3-V144M, arrowheads).  
97 We also found that carboxy-terminal GFP-tagged ADAT3 exhibited the same aberrant nucleocytoplasmic  
98 localization pattern and increased formation of cytoplasmic foci observed with N-terminal GFP-ADAT3  
99 (Supplemental Figure 1). In addition, we found that the steady-state levels of GFP-ADAT3-V144M variant  
100 was lower than ADAT3-WT (Figure 1D, Supplemental Figure 1), showing that the aberrant subcellular  
101 localization pattern of ADAT3-V144M was not simply due to greater expression.

102 In contrast to the cytoplasmic localization of transiently expressed GFP-ADAT3-WT alone, the co-  
103 expression of ADAT2 with ADAT3-WT led to GFP-ADAT3-WT being localized to the nucleus with only  
104 a minor proportion of signal remaining in the cytoplasm (Figure 1A, B; GFP-ADAT3-WT + ADAT2),  
105 consistent with the observation that ADAT2 dimerization with ADAT3 is required for nuclear import of  
106 the ADAT2/3 complex (15). Similarly, we found that co-expression of ADAT2 with ADAT3-V144M could  
107 also induce the translocation of GFP-ADAT3-V144M into the nucleus (Figure 1A, B; GFP-ADAT3-  
108 V144M + ADAT2). The ability of ADAT2 co-expression to induce the translocation of GFP-ADAT3-  
109 V144M into the nucleus indicates that ADAT3-V144M can still interact with ADAT2. However, while a  
110 slight diffuse signal of GFP-ADAT3-WT remained in the cytoplasm even with ADAT2 co-expression, the  
111 ADAT3-V144M variant displayed much greater nuclear accumulation in the majority of cells (Figure 1B).  
112 Remarkably, co-expression of ADAT2 with the ADAT3-V144M variant also reduced the percentage of  
113 cells with cytoplasmic GFP-ADAT3 foci to nearly wildtype levels (Figure 1C). These results uncover an  
114 aberrant subcellular localization pattern for ADAT3-V144M characterized by perturbed nucleocytoplasmic

115 distribution and increased formation of cytoplasmic foci that can be suppressed by co-expression with  
116 ADAT2. The formation of aberrant cytoplasmic aggregates exhibited by ADAT3-V144M in the absence  
117 of ADAT2 co-expression suggests that the V144M mutation causes increased propensity for protein  
118 misfolding and aggregation which can be ameliorated by interaction with the ADAT2 subunit and import  
119 into the nucleus.

120

121 **ADAT3-V144M maintains interactions with ADAT2 but exhibits increased propensity to homo-**  
122 **oligomerize**

123 The perturbed subcellular localization of ADAT3-V144M along with its accumulation in  
124 cytoplasmic foci suggests that the V144M mutation could be altering the structure of ADAT3 leading to  
125 misfolding and aggregation. Furthermore, the reduction in ADAT3-V144M cytoplasmic aggregates by  
126 ADAT2 co-expression suggests that assembly of ADAT3 with ADAT2 is critical for preventing ADAT3  
127 self-association, especially in the context of the ADAT3-V144M variant. To analyze the interaction  
128 between ADAT3-V144M and ADAT2, we co-expressed GFP-tagged ADAT3-WT or V144M with ADAT2  
129 tagged with the twin Strep-tag (32) in 293T human embryonic kidney cells. The Strep-tag allows for one-  
130 step affinity purification of Strep-tagged proteins on streptactin resin under native conditions followed by  
131 gentle elution with biotin to preserve any protein-protein interactions. After purification of Strep-ADAT2  
132 on streptactin resin, we found that comparable levels of GFP-ADAT3-WT and GFP-ADAT3-V144M were  
133 interacting with ADAT2 (Figure 2A). These results indicate that ADAT3-V144M interacts with similar  
134 efficiency as ADAT3-WT with ADAT2, consistent with the ability of ADAT2 to induce the translocation  
135 of either ADAT3-WT or V144M into the nucleus (Figure 1A).

136 To further analyze the interaction between ADAT2 and ADAT3-V144M, we used a reciprocal  
137 approach in which we purified ADAT3 and examined the amount of co-purifying ADAT2. For these assays,  
138 we transiently expressed either ADAT3-WT or V144M fused to a carboxy-terminal Strep-tag for  
139 purification and elution of ADAT2/3. Since ADAT2 levels have been shown to be limiting for the formation  
140 of ADAT2/3 complexes in human cells (15), we co-expressed His-tagged ADAT2 with either ADAT3-

141 Strep-WT or ADAT3-Strep-V144M to facilitate detection of any associated ADAT2. After purification on  
142 streptactin resin, bound ADAT3 complexes were eluted with biotin and analyzed by immunoblotting. Using  
143 this approach, we detected the co-purification of His-ADAT2 with either ADAT3-WT or ADAT3-V144M,  
144 consistent with the assembly of an expressed ADAT2/3 complex from the expressed proteins (Figure 2B).  
145 We detected a comparable level of His-ADAT2 that copurified with ADAT3-WT or V144M, corroborating  
146 our finding that the V144M mutation does not dramatically affect the efficiency of the interaction between  
147 ADAT2 and ADAT3.

148         While the association between ADAT2 and ADAT3 by co-IP analysis does not appear to be  
149 affected by the V144M mutation, the aberrant subcellular localization into cytoplasmic foci suggests that  
150 ADAT3 could have defects in folding that increases its tendency to oligomerize and aggregate. To test for  
151 self-oligomerization, we expressed either WT or V144M versions of GFP-ADAT3 simultaneously with  
152 WT or V144M forms of ADAT3-Strep (Figure 2C, lanes 2-5) (32). We detected a low level of GFP-  
153 ADAT3-WT copurifying with ADAT3-strep-WT suggesting that ADAT3 could already be susceptible to  
154 aggregation even in the wildtype state (Figure 2C, lane 7). Notably, we found that purification of ADAT3-  
155 strep-V144M led to an increase in the amount of copurifying GFP-ADAT3-V144M compared to ADAT3-  
156 WT with itself (Figure 2C, compare lanes 7 and 8). Moreover, we found that co-expression of His-ADAT2  
157 could suppress the self-oligomerization of ADAT3-WT while partially reducing the self-association of the  
158 ADAT3-V144M variant (Figure 2C, lanes 9 and 10). The reduction of ADAT3 self-oligomerization by  
159 ADAT2 co-expression is consistent with our observation that ADAT3-V144M foci can be suppressed by  
160 ADAT2 co-expression (Figure 1A). We also note that purification of either ADAT3-WT or V144M led to  
161 similar levels of copurifying ADAT2 (Figure 2C, ADAT2, lanes 9 and 10), consistent with our findings  
162 above that ADAT3-V144M maintains interactions with ADAT2. Altogether, these results provide further  
163 evidence that the V144M mutation increases the propensity of ADAT3 to misfold and aggregate if not  
164 properly assembled with ADAT2. The ability of ADAT2 to prevent self-association of either ADAT3-WT  
165 or V144M uncovers a critical role for proper stoichiometric levels of ADAT2 and ADAT3 to promote  
166 proper folding and nuclear import of ADAT3.

167

168 **ADAT3-V144M is targeted by the cytoplasmic HSP60 and TRiC chaperonin complexes**

169       The perturbed subcellular localization of ADAT3-V144M combined with its increased propensity  
170 to aggregate prompted us to investigate whether ADAT3-V144M also displayed interactions with other  
171 cellular proteins. For proteomic analyses, we expressed either the WT or V144M versions of ADAT3 as  
172 fusion proteins with the FLAG epitope tag in 293T human embryonic kidney cells in order to facilitate the  
173 expression and purification of ADAT3 complexes. Following immunoprecipitation (IP), the purified  
174 samples were analyzed by SDS-PAGE and silver stain to identify ADAT3-interacting proteins. While no  
175 observable bands were found in a control purification from cells transfected with vector alone, we could  
176 detect the purification of FLAG-ADAT3-WT or V144M (Figure 3A, arrowhead) along with an additional  
177 band at ~60 kDa specifically enriched with the ADAT3-V144M purification (Figure 3A, arrow). Proteomic  
178 analysis of the entire eluted samples from control and ADAT3 purifications by liquid chromatography-  
179 mass spectrometry (LC-MS) validated the successful recovery of ADAT3-WT or ADAT3-V144M from  
180 cellular extracts (Figure 3B, Supplemental Table 1). Notably, LC-MS analysis also revealed the  
181 copurification of heat shock protein 60 (HSP60) and all eight subunits of the TCP-1 Ring Complex (TRiC,  
182 also known CCT) with ADAT3-V144M but not ADAT3-WT (Figure 3B, Supplemental Table 1). HSP60  
183 and TRiC subunits were identified among the top 20 scoring matches in the ADAT3-V144M purification.  
184 The HSP60 protein forms a homo-oligomeric chaperonin complex consisting of a double-heptameric ring  
185 that associates with misfolded proteins in the cytoplasm and mitochondria to provide an environment for  
186 protein refolding (33-36). Similar to HSP60, TRiC is a major eukaryotic cytoplasmic chaperonin that is  
187 responsible for the correct folding of endogenous client proteins that are prone to misfolding (34,37). The  
188 interaction of chaperonin complexes with ADAT3-V144M is consistent with a misfolding and aggregation  
189 defect caused by the V144M mutation as suggested above by microscopy and co-IP. We also note that  
190 peptides matching ADAT2 were not identified in the purifications of either ADAT3-WT or V144M when  
191 purified without co-expression of ADAT2. The lack of copurification of ADAT2 with over-expressed



192 ADAT3 agrees with previous findings that the levels of endogenous ADAT2 are limiting for formation of  
193 an ADAT2/3 complex (15).

194 To verify and characterize the interaction between HSP60 and ADAT3-V144M, we performed co-  
195 IP experiments followed by immunoblotting. For a subset of these assays, we co-expressed His-tagged  
196 ADAT2 with either WT or V144M versions of FLAG-ADAT3 to investigate whether ADAT2 influences  
197 HSP60 interactions as seen above. While a low level of HSP60 copurified with ADAT3-WT, we detected  
198 a significantly increased amount of HSP60 associated with the ADAT3-V144M variant (Figure 3C, HSP60,  
199 lanes 7 and 8). Similar to the oligomerization results described above, the interaction between HSP60 and  
200 ADAT3-V144M could be greatly suppressed by co-expression with ADAT2 (Figure 3C, compare lanes 8  
201 and 10). The reduction in HSP60 association with ADAT3 by ADAT2 co-expression again demonstrates  
202 that assembly of ADAT2 with ADAT3 is likely to prevent aggregation and subsequent targeting by  
203 chaperonin complexes. Of note, a similar level of ADAT2 copurified with both ADAT3-WT or V144M  
204 (Figure 3C, ADAT2, lanes 9 and 10), further corroborating the results observed above that the V144M  
205 mutation does not compromise the interaction between ADAT2 and ADAT3.

206 Using an analogous co-IP approach, we also found that the TRiC complex subunits TCP1 and  
207 CCT7 exhibited significantly increased association with ADAT3-V144M compared to wildtype ADAT3  
208 (Figure 3D and E, lanes 7 and 8). Similar to ADAT3 interaction with HSP60, we also found that co-  
209 expression of ADAT2 could suppress the association between the TRiC complex with ADAT3-WT while  
210 significantly reducing the amount of TRiC associated with ADAT3-V144M (Figure 3D and E, compare  
211 lanes 7 and 8 to 9 and 10). The targeting of either ADAT3-WT or V144M by cellular chaperonin complexes  
212 provide evidence that ADAT3-WT is prone to misfolding with the V144M mutation further exacerbating  
213 the misfolding and/or aggregation phenotype. Furthermore, these studies reveal a critical role for ADAT2  
214 in facilitating the proper folding of ADAT3 in addition to its role in the nuclear import of assembled  
215 ADAT2/3 complexes.

216

217 **Purified ADAT2/3 complexes assembled with ADAT3-V144M exhibit defects in adenosine deaminase**  
218 **activity**

219 The aggregation phenotype exhibited by ADAT3-V144M indicates that the V144M mutation is  
220 likely to be altering the folding and structure of ADAT3 that could compromise the activity of the ADAT2/3  
221 complex. To probe if the V144M mutation affects ADAT3 activity in wobble inosine formation, we  
222 investigated the biochemical properties of the purified ADAT2/3 complexes assembled with either Strep-  
223 ADAT3-WT or ADAT3-V144M that were described above (Figure 2B). We analyzed the purified  
224 ADAT2/3 complexes for enzymatic activity using an adenosine deaminase assay based upon the separation  
225 of digested RNA nucleoside products by thin layer chromatography (TLC) (Figure 4A). For this assay, *in*  
226 *vitro* transcribed tRNA substrates were internally radiolabeled at adenosine residues using [ $\alpha$ -<sup>32</sup>P]ATP,  
227 incubated with purified ADAT2/3 complexes, digested to nucleoside monophosphates with P1 nuclease  
228 and separated by TLC to detect inosine monophosphate (IMP) formation (38,39). As substrates, we used  
229 pre- and mature versions of tRNA-Val-AAC since they have been shown to be substrates of ADAT2/3-  
230 catalyzed deamination *in vitro* and *in vivo* (15).

231 Using this assay, we found that purified ADAT2/3 complexes assembled with ADAT3-WT  
232 exhibited adenosine deaminase activity on both pre- or mature tRNA-Val-AAC as evidenced by the  
233 formation of inosine (Figure 4B and C, IMP, lanes 2-4). In contrast to ADAT2/3-WT complexes, purified  
234 ADAT2/3-V144M complexes were significantly diminished in adenosine deaminase activity on either pre-  
235 or mature tRNA-Val-AAC (Figure 4B and C, compare lanes 2-4 to lanes 5-7). Based upon the 5-fold  
236 dilutions of enzyme, we found that ADAT2/3 complexes assembled with ADAT3-V144M displayed at  
237 least a 25-fold decrease in adenosine deaminase activity compared to complexes assembled with ADAT3-  
238 WT on either pre- or mature-tRNA-Val-AAC (Figure 4B and C). These findings reveal that while ADAT3-  
239 V144M can still associate with ADAT2 in human cells, the variant ADAT2/3-V144M complexes exhibit  
240 major defects in adenosine deaminase activity.

241

242 **Human patients with homozygous ADAT3-V144M mutations exhibit perturbations in cellular tRNA**  
243 **adenosine deaminase activity**

244 The results thus far provide evidence that ADAT3-V144M exhibits aberrant subcellular  
245 localization, increased propensity to aggregate, and defects in adenosine deaminase activity. To examine  
246 the molecular effects of the V144M mutation in the human population, we generated lymphoblastoid cell  
247 lines (LCLs) from two unrelated human patients harboring homozygous V144M missense mutations in the  
248 *ADAT3* gene (referred to as V144M-LCLs generated from patients 1 and 2; P1 and P2; Figure 5A-B). P1  
249 (09DG0640) has been described in detail previously by our group (16,18). Briefly, this is a 6-year old  
250 female with severe ID, short stature, microcephaly, strabismus, deafness and history of global  
251 developmental delay. She is part of a consanguineous family with three similarly affected siblings, one of  
252 whom (09DG00479) is shown in Figure 5C. P2 (11DG1699) is a 24-year old male with severe ID, short  
253 stature, microcephaly, strabismus and history of global developmental delay as a child. P2 is part of a  
254 consanguineous family with a similarly affected brother (17). LCLs generated from both ID-affected  
255 individuals with homozygous V144M mutations were compared to control lymphoblasts from an ethnically  
256 matched, healthy, unrelated individual.

257 We first examined the levels of ADAT3 protein in the LCLs to determine if the expression or  
258 stability of ADAT3 was affected by the V144M mutation. Based upon immunoblotting of whole cell  
259 lysates, no major change in the endogenous levels of ADAT3 was detected between WT and V144M-LCLs  
260 (Figure 5D, ADAT3). Moreover, we detected no significant change in the levels of the ADAT3  
261 heterodimeric binding subunit, ADAT2, between any of the LCLs (Figure 5D, ADAT2). The comparable  
262 steady-state levels of wildtype ADAT3 and the V144M variant suggest the V144M mutation could be  
263 affecting ADAT3 function without affecting the levels of protein.

264 We next employed the TLC-based IMP detection assay described above to investigate whether the  
265 V144M mutation affects adenosine deaminase activity in the cells of ID-affected individuals expressing  
266 only the ADAT3-V144M variant. Due to the limited amounts of ADAT2/3 found in LCLs combined with  
267 the lack of an effective antibody for immunoprecipitation (data not shown), we optimized an *in vitro*

268 adenosine deaminase activity assay using whole cell extracts prepared from the human LCLs described  
269 above. This was made possible since previous studies have shown that the ADAT2/3 enzyme complex is  
270 the only known cellular activity that catalyzes wobble inosine formation in tRNA (9). Since we found that  
271 purified ADAT2/3 complexes exhibit defects in adenosine deaminase activity on pre- and mature tRNA-  
272 Val-AAC (Figure 4), we tested whether the LCL extracts also displayed differences in activity on these  
273 same substrates.

274 While no detectable IMP was detected in tRNA substrates pre-incubated with buffer alone, we  
275 could readily detect the formation of IMP in both pre- and mature-tRNA-Val-AAC after pre-incubation  
276 with whole cell extracts prepared from WT-LCLs (Figure 5E and F, lanes 2-4). In addition to IMP, we also  
277 detected a faster-migrating adenosine modification that is consistent with the formation of 1-  
278 methyladenosine (Figure 5E, m1A) (38). Since tRNA-Val-AAC has been shown to contain m1A at position  
279 58 in human cells (40), the formation of m1A on the tRNA substrates is likely due to endogenous  
280 TRMT6/TRMT61 complexes present in cellular extracts (41). The formation of m1A provides an additional  
281 control for normalizing cellular activity since they are catalyzed by two different enzyme complexes.

282 Agreeing with the activity defect discovered above with purified ADAT3-V144M, we found that  
283 V144M-LCL extracts exhibited at least a 25-fold decrease in the generation of inosine in pre-tRNA-Val-  
284 AAC (Figure 5E, lanes 5-10). The defect in adenosine deaminase activity for pre-tRNA-Val-AAC was not  
285 due to general loss of activity of the V144M-LCL extracts or underloading since the formation of m1A was  
286 similar between all three extracts (Figure 5E, m1A). Interestingly, we found that WT- and V144M-LCL  
287 extracts displayed a similar level of adenosine deaminase activity on mature tRNA-Val-AAC (Figure 5F).  
288 Thus, the V144M mutation appears to affect adenosine deaminase activity on the pre-tRNA-Val-AAC  
289 substrate but not processed, mature tRNA-Val-AAC. As an additional control, we compared the level of  
290 adenosine deaminase activity in the V144M-LCLs to a completely different LCL line procured from a  
291 healthy, wildtype individual of similar age and also detected a similar decrease in tRNA modification  
292 activity on pre-tRNA-Val-AAC associated with the V144M-LCL extracts (Supplemental Figure 2). These  
293 findings uncover a severe modification defect associated with the ADAT3-V144M variant in human

294 individuals on tRNA-Val-AAC that affects adenosine deaminase activity on the unprocessed form of tRNA  
295 greater than the mature form. Importantly, these findings suggest that individuals expressing only the  
296 ADAT3-V144M variant are likely to be compromised but not completely abolished in adenosine deaminase  
297 activity on wobble inosine-containing tRNA substrates *in vivo*.

298

299 **Individuals homozygous for the ADAT3-V144M mutation exhibit decreased wobble inosine**  
300 **modification in some but not all tRNAs**

301         Based upon the adenosine deaminase activity defects exhibited by ADAT2/3-V144M complexes,  
302 we next investigated the wobble inosine status of tRNA-Val-AAC isolated from the V144M-LCLs of ID-  
303 affected individuals. Since inosine is read as G by reverse transcriptases (42-44), the formation of inosine  
304 at the wobble position of tRNA-Val-AAC can be directly detected by sequencing of amplified cDNA  
305 obtained by reverse transcription of cellular tRNA. In WT-LCLs, the majority of wobble adenosines in  
306 tRNA-Val-AAC were converted to inosine as evidenced by the presence of a predominant “G” peak at  
307 position 34 (Figure 6A, Control-WT1). We also compared the level of wobble inosine modification in the  
308 WT-LCLs to a completely different LCL line procured from a healthy individual of a similar age and found  
309 a similar extent of wobble inosine modification (Figure 6A, Control-WT2). Notably, the level of wobble  
310 inosine modification in tRNA-Val-AAC was greatly reduced in both V144M-LCLs with the majority of  
311 peak signal at the wobble position being the unmodified “A” (Figure 6A, V144M-P1 and P2). These results  
312 provide the first evidence that the ADAT3-V144M mutation and its associated molecular defects have an  
313 impact on the levels of tRNA wobble inosine modification *in vivo*.

314         Based upon the inosine modification defect in tRNA-Val-AAC, we also investigated whether  
315 additional tRNAs containing inosine at the wobble position were affected by the ADAT3-V144M mutation.  
316 Due to technical challenges in RT-PCR sequencing analysis caused by the diverse number of tRNA  
317 isodecoder variants encoded by mammalian genomes, we investigated the modification status of human  
318 tRNAs using poisoned primer extension assays with a ddCTP terminator, to distinguish I<sub>34</sub> (terminated with  
319 ddCTP) from A<sub>34</sub>, terminated at the next guanosine (Fig. 6B-D). Using this assay, we observed substantially

320 reduced frequency of I<sub>34</sub> modification for tRNA-Val-AAC and tRNA-Ile-AAU (Fig. 6B and C), but only a  
321 slight defect in modification of tRNA-Leu-AAG (Figure 6D). These results suggest that not all tRNAs are  
322 affected to the same extent by the ADAT3-V144M mutation, consistent with the reduced but not abolished  
323 adenosine deaminase activity detected in V144M-LCL extracts. Taken altogether, these studies uncover a  
324 wobble inosine hypomodification defect for particular tRNAs in the cells of individuals that are  
325 homozygous for the ADAT3 V144M mutation, consistent with the multiple perturbations in ADAT3  
326 localization and activity associated with the V144M mutation.

327

## 328 **Discussion**

329 The molecular consequences of the ID-causing ADAT3-V144M mutation have previously been  
330 unknown. Surprisingly, the V144M mutation has little to no effect on the steady-state levels of ADAT3 nor  
331 on binding to the ADAT2 subunit. However, the ADAT3-V144M mutation significantly alters the  
332 subcellular localization properties of ADAT3 and greatly compromises the adenosine deaminase activity  
333 of ADAT2/3 complexes assembled with ADAT3-V144M. While the V144M mutation is predicted to be a  
334 relatively minor change since valine and methionine represent amino acid residues with hydrophobic side  
335 chains of similar molecular size, modeling with the TadA homodimeric complex suggests that the mutation  
336 could alter a loop located on the surface of the ADAT3 protein (16). The alteration in ADAT3 structure  
337 could then affect the biochemical properties of the assembled ADAT2/3 complex such as substrate binding  
338 or adenosine deaminase activity on certain tRNA substrates. Intriguingly, studies with *Trypanosoma brucei*  
339 homologs of Tad2p/Tad3p have revealed a role for ADAT3 in substrate tRNA binding and coordination of  
340 a single zinc ion (39,45). This would suggest that the ADAT3-V144M mutation may alter the substrate  
341 recognition site of the ADAT2/3 complex thereby affecting the binding of or catalysis step on certain tRNA  
342 substrates. Indeed, we find that the ADAT3-V144M mutation has differential effects on wobble inosine  
343 levels with certain tRNAs exhibiting a substantial decrease in tRNA modification while others display little  
344 to no major change. This differential effect could be due to the recognition mechanism of human ADAT2/3,  
345 which targets tRNA anticodon loops for inosine modification based upon their structural context rather than

346 simply their sequence alone (46). Further refinement using RNA binding assays and kinetics will provide  
347 insight into the specific effect of the V144M mutation on ADAT2/3 enzymatic activity that influence  
348 inosine modification levels *in vivo*.

349         The association of ADAT3-WT with cytoplasmic chaperonins suggests that endogenous ADAT3  
350 could be prone to misfolding and aggregation during translation or after release from the ribosome if not  
351 assembled with ADAT2. Consistent with our results, others have found that expression of soluble  
352 eukaryotic ADAT3 in *E. coli* requires co-expression of ADAT2 (13,47). The increased tendency of  
353 ADAT3-V144M to form cytoplasmic foci suggests that the V144M mutation could further aggravate  
354 misfolding and aggregation. Of note, structural studies have shown that methionine differs from other  
355 hydrophobic residues in that it can form non-covalent interactions with aromatic-containing residues such  
356 as tryptophan, tyrosine or phenylalanine (48,49). In addition, molecular modeling simulation experiments  
357 have identified approximately one-third of solved protein structures to contain a methionine-aromatic  
358 residue interaction (50). Thus, the substitution of a valine to methionine in the N-terminal extension of  
359 ADAT3 could lead to a non-specific interaction with aromatic residues of another ADAT3 protein leading  
360 to aggregation. Furthermore, the mutant methionine residue in ADAT3-V144M could form an  
361 intramolecular interaction that leads to a different conformation that exacerbates misfolding and  
362 aggregation. The misfolding of the ADAT3-V144M protein could reduce the total pool of properly-folded  
363 ADAT3 that can interact with ADAT2 leading to decreased levels of active ADAT2/3 complexes.  
364 Intriguingly, the perturbed nuclear localization and aggregation into discrete cytoplasmic foci exhibited by  
365 the ADAT3-V144M variant is reminiscent of other RNA binding proteins known to misfold and homo-  
366 oligomerize in neurological disorders such as TDP-43 and TLS/FUS (51-55).

367         Due to the intricate dynamics of tRNA processing (56-58), the disruption of nucleocytoplasmic  
368 localization by the V144M mutations provides yet another possible contributor to the decreased levels of  
369 wobble inosine tRNA modification in ID-affected individuals. The increased propensity of ADAT3-  
370 V144M to localize to the nucleus indicates that there could be a relative decrease in the amount of  
371 cytoplasmic ADAT3 in ID-affected individuals with homozygous ADAT3-V144M mutations. The

372 cytoplasmic population of ADAT3 assembled with ADAT2 could play a role in modifying tRNAs that have  
373 been exported without prior wobble inosine modification by nuclear ADAT2/3. Thus, the disruption of the  
374 nucleocytoplasmic ratio by the V144M mutation combined with the activity defect of ADAT2/3-V144M  
375 complexes could lead to the reduction in wobble inosine modification levels observed in the tRNAs of  
376 individuals homozygous for the ADAT3-V144M mutation. In addition, newly-exported tRNAs lacking  
377 inosine could undergo retrograde transport back into the nucleus to be modified by nuclear ADAT2/3  
378 (59,60). Since ADAT2/3-V144M complexes in extract appear to be defective in modifying pre- but not  
379 mature tRNA, retrograde transport could play a critical role in providing at least enough tRNA wobble  
380 inosine modification for sufficient translation to sustain cell viability.

381         It is unknown why the ADAT3-V144M mutation causes increased localization to the nucleus.  
382 Possible reasons include fortuitous interaction with nuclear import factors, increased interaction with  
383 ADAT2 which is responsible for ADAT3 import or loss of interaction with a cytoplasmic retention factor.  
384 Investigation of the ADAT3-interactome revealed no obvious candidates that suited any of these scenarios,  
385 which is not surprising considering that these factors are likely to be transiently associated. Another  
386 possibility is that the increased level of ADAT3 in the nucleus is due to the import of ADAT3 oligomers  
387 into the nucleus by ADAT2. Thus, for every ADAT2 imported into the nucleus, there could be more than  
388 one ADAT3-V144M subunit translocated alongside.

389         Based upon the findings, we hypothesize that a certain level of wobble inosine modification in  
390 particular tRNAs is necessary for the expression of cellular mRNAs that are critical for proper cellular  
391 physiology and human development. Consistent with this prediction, studies in yeast *Schizosaccharomyces*  
392 *pombe* and the plant *Arabidopsis thaliana* have shown that a decrease in tRNA wobble inosine  
393 modifications leads to temperature sensitivity, cell cycle arrest and growth retardation (12,14). Moreover,  
394 genome wide studies predict numerous highly-expressed genes that are dependent upon ADAT2/3-  
395 catalyzed wobble inosine modification for translation (61). Thus, the V144M mutation could alter the  
396 cellular proteome in multiple tissues with particularly acute effects in the brain on neural growth and  
397 differentiation.



398

## 399 **Materials and Methods**

### 400 **Human subjects**

401 Evaluation of affected members by a board-certified clinical geneticist included obtaining medical and  
402 family histories, clinical examination, neuroimaging and clinical laboratory investigations. After obtaining  
403 a written informed con- sent for enrollment in an IRB-approved project (KFSHRC RAC#2070023), venous  
404 blood was collected in EDTA and sodium heparin tubes for DNA extraction and establishment of  
405 lymphoblastoid cell lines (patients 11DG1699 and 09DG0640, and control 15DG0421), respectively. A  
406 separate consent to publish photographs was also obtained.

### 407 **Plasmids**

408 The open reading frame for ADAT2 was PCR amplified from cDNA clone RC212395 (Origene)  
409 and cloned into pcDNA3.1 (Thermo Fisher) for expression as an untagged protein or as an N-terminal  
410 fusion protein with either the 6xHis tag or twin Strep-tag (32). The open reading frame for human ADAT3  
411 was PCR amplified from cDNA plasmid HsCD00326376 (PlasmID Repository, Harvard Medical School)  
412 and cloned into either pcDNA3.1-Strep-C, pcDNA3.1-3xFLAG-SBP, pcDNA3.1-N-EGFP, pcDNA3.1-  
413 EGFP-C (62). The ADAT3-V144M variant was generated by Gibson mutagenesis using cloning of PCR  
414 fragments and verified by Sanger sequencing.

### 415 **Cell culture**

416 HeLa S3 human cervical carcinoma and 293T human embryonic kidney cell lines were cultured in  
417 Dulbecco's Minimal Essential Medium (DMEM) containing 10% fetal bovine serum, 2 mM L-alanyl-L-  
418 glutamine (GlutaMax, Gibco) and 1% Penicillin/Streptomycin. Human lymphoblastoid cell lines were  
419 cultured in Roswell Park Memorial Institute (RPMI) 1640 Medium containing 15% fetal bovine serum, 2  
420 mM L-alanyl-L-glutamine (GlutaMax, Gibco) and 1% Penicillin/Streptomycin. The additional wildtype  
421 control LCL line was obtained from Coriell Institute for Medical Research #GM22647.

### 422 **Microscopy**

423           Hela cells were plated at  $2.5 \times 10^5$  cells on a 6-well plate. Cells were transfected 1 day after plating  
424 with a total of 2.5  $\mu\text{g}$  of DNA using Lipofectamine 3000. Cells were imaged 48 hours post-transfection on  
425 an EVOS fluorescence microscopy imaging system (ThermoFisher). For DNA staining, cells were washed  
426 twice with PBS and then incubated for 30 minutes at 37 degrees with PBS containing 10% FBS and 1  $\mu\text{M}$   
427 of Hoechst and then imaged. For cytoplasmic foci quantification, 5 images were taken of each well and the  
428 number of GFP-positive cells along with the number of cells containing greater than 3 foci were counted  
429 in each of the 5 frames. The experiment was performed 3x on N-terminal GFP-tagged ADAT3 with a  
430 minimum of 580 cells counted per experiment and independently verified by blinded analysis. For C-  
431 terminal GFP-tagged ADAT3, the experiment was performed 2x with independent verification. For  
432 quantification of nuclear ADAT3, each of the three N-terminal experiments were quantified using the same  
433 minimum of 580 cells counted per experiment.

#### 434 **Protein purification and analysis**

435           Transient transfection and cellular extract production were performed as previously described (63).  
436 In brief,  $2.5 \times 10^6$  293T HEK cells were transiently transfected by calcium phosphate DNA precipitation  
437 with 10-20  $\mu\text{g}$  of plasmid DNA followed by preparation of lysate by hypotonic freeze-thaw lysis 48 hours  
438 post-transfection. For anti-FLAG purification, whole cell extract from transiently transfected cells cell lines  
439 (1 mg of total protein) was rotated with 20  $\mu\text{L}$  of Anti-DYKDDDDK Magnetic Beads (Takara BioUSA,  
440 Clontech or Syd labs) for 2 h at 4° C in lysis buffer (20 mM HEPES at pH 7.9, 2 mM  $\text{MgCl}_2$ , 0.2 mM  
441 EGTA, 10% glycerol, 1 mM DTT, 0.1 mM PMSF, 0.1% NP-40) with 200 mM NaCl. Resin was washed  
442 three times using the same buffer followed by RNA extraction or protein analysis. Strep-tagged proteins  
443 were purified using MagSTREP “type3” XT beads, 5% suspension (IBA Lifesciences) under similar  
444 conditions as with anti-FLAG purifications and eluted with desthiobiotin.

445           Protein identification was performed by the URMC Mass Spectrometry Resource Laboratory.  
446 Briefly, protein samples were reduced, alkylated and digested in solution with trypsin followed by  
447 purification and desalting on an analytical C18 column tip. Peptide samples were analyzed by HPLC

448 chromatography coupled with electrospray ionization on a Q Exactive Plus Hybrid Quadrupole-Orbitrap  
449 mass spectrometer (Thermo Fisher). Protein identification through tandem mass spectra correlation was  
450 performed using SEQUEST and Mascot.

451 Cellular extracts and purified protein samples were fractionated on NuPAGE Bis-Tris  
452 polyacrylamide gels (Thermo Scientific) followed by transfer to Immobilon FL PVDF membrane  
453 (Millipore) for immunoblotting. For analysis of LCL extracts,  $5 \times 10^6$  lymphoblast cells were harvested and  
454 proteins were extracted using radioisotope immunoprecipitation assay (RIPA) buffer (50 mM TrisHCl, pH  
455 7.5, 1% NP-40, 0.5% sodium deoxycholate, 0.1% SDS, 150 mM NaCl, 2mM EDTA). Antibodies were  
456 against the following proteins : FLAG epitope tag (L00018, Sigma), 6xHis tag (MA1-21315, Thermo  
457 Fisher), GFP (sc-9996, Santa Cruz Biotechnology), Strep-tag II-tag (NC9261069, Thermo Fisher), ADAT3  
458 (Abcam, ab192987), ADAT3 (H00113179-B01P, Abnova), ADAT2 (ab135429, Abcam), HSP60 (A302-  
459 845A, Bethyl Labs), CCT1 (sc-53454, Santa Cruz Biotechnologies), CCT7 (A304-730A-M, Bethyl Labs).  
460 Primary antibodies were detected using IRDye 800CW Goat anti-Mouse IgG (925-32210, Thermofisher)  
461 or Rabbit (SA5-35571, Thermofisher) or Rat (925-32219, LI-COR Biosciences), or IRDye 680RD Goat  
462 anti-Mouse IgG (926-68070, LI-COR Biosciences) or Rabbit (925-68071). Immunoblots were scanned  
463 using direct infrared fluorescence via the Odyssey System (LI-COR Biosciences).

#### 464 **Adenosine deaminase assays**

465 Internally-radiolabeled tRNA substrates were prepared by T7 *in vitro* transcription of DNA  
466 templates generated by PCR amplification. Oligonucleotides containing the T7 promoter upstream of tRNA  
467 sequences were PCR amplified using Herculase II DNA polymerase or Taq DNA Polymerase (New  
468 England Biolabs) followed by agarose gel purification of PCR amplification products. *In vitro* transcription  
469 was performed using Optizyme T7 RNA polymerase (Fisher Scientific) with 10 mM each of UTP, CTP  
470 and GTP, 1mM of ATP and 250  $\mu$ Ci of [ $\alpha$ - $^{32}$ P]-ATP (800Ci/mmol, 10mCi/ml). *In vitro* transcription  
471 reactions were incubated at 37° C for 2 hours followed by DNase treatment and purification using RNA  
472 Clean and Concentrator columns (Zymo Research). Full-length tRNA transcripts were verified on a 15%  
473 Polyacrylmide-urea gel stained with SYBR Gold nucleic acid stain (Thermo Fisher). Before conducting

474 enzymatic assays, all tRNA substrates were refolded by thermal denaturation at 95°C for 2 minutes in buffer  
475 containing a final concentration 5 mM TRIS pH7.5 and 0.16 mM EDTA, quick chilling on ice for 2 min  
476 and refolding at 37°C in the presence of Hepes pH 7.5, MgCl<sub>2</sub>, and NaCl.

477 For adenosine deaminase assays, ~30 ng of refolded tRNA substrate was incubated with titrations  
478 of enzyme starting at the highest concentration of ~15 nM of Strep-purified ADAT3. Serial dilutions  
479 occurring in 1/5 increments then were carried out in the presence of 12.5 µg/mL BSA. For enzymatic  
480 reactions from extracts, the highest concentration of protein started at ~20 µg of total protein in the reaction.  
481 Dilutions occurring in 1/5 increments were then carried out. Reactions were incubated at 37°C for 60  
482 minutes and RNA was purified using RNA Clean and Concentrator columns. The tRNA was eluted in 20  
483 µL of water and 10 µL was subjected to nuclease P1 digestion overnight in total volume of 13 µL and 0.125  
484 units of P1 in 250 mM Ammonium Acetate pH 5.35. Half of the P1-nuclease treated samples were spotted  
485 on a POLYGRAM® polyester Cellulose MN 300 plates (Macherey Nagel) run in solvent B (0.1M sodium  
486 phosphate buffer pH 6.8:NH<sub>4</sub> sulfate:n-propanol (100:60:2 [v:w:v])). Phosphorimaging was conducted on  
487 a Bio-Rad Personal Molecular Imager followed by analysis using NIH ImageJ software.

#### 488 **RNA analysis**

489 RNA extraction was performed on 10 x 10<sup>6</sup> human lymphoblastoid cell lines using Trizol LS reagent  
490 (Thermo Fisher). For RT-PCR, total RNA (~1.25 µg) was reverse transcribed for tRNA-Val-AAC using  
491 Superscript IV enzyme followed by the QIAquick PCR purification kit. cDNA was then PCR amplified  
492 using Herculase II DNA polymerase (Agilent Genomics). The PCR product was gel extracted and analyzed  
493 by Sanger sequencing (ACGT, Inc). The following primers were used:

494 Val RT primer: TGTTTCCGCCTGGTTTTG

495 Val PCR primer F:

496 GAACTAAGCTTGTTTCAGAGTTCTACAGTCCGGACTACAAAGACCATGACGGTGATTATAAAG

497 ATCATGACATGTTTCCGTAGTGTAGTGGTTATCAC

498 Val PCR primer R: CACT TGTTTCCGCCTGGTTTTGATCCAGGGACC

499 For primer extension assays to monitor inosine modification status, oligonucleotides were 5' end  
500 labeled and purified as previously described (64). In a 5  $\mu$ L annealing reaction, 0.25 – 1 pmol of labeled  
501 primers were annealed to 0.6  $\mu$ g of bulk RNA by incubation for 3 min at 95°C followed by slow cooling  
502 and incubation for 30 min at 50-55°C. The annealing product was then extended using 64 U Superscript III  
503 (Invitrogen) in a 10  $\mu$ L reaction containing 1X First Strand buffer, 2 mM ddCTP, 0.5 mM of each of the  
504 other dNTPs and 10 mM MgCl<sub>2</sub> at 50 - 55°C for 1 h. Reactions were stopped by addition of 2 X RNA  
505 loading dye containing 98% formamide, 10 mM EDTA, 1 mg/mL bromophenol blue, and 1 mg/mL xylene  
506 cyanol, resolved on a 7M urea - 15% polyacrylamide gel, and the dried gel was imaged on a Typhoon  
507 phosphorimager and quantified as described (65). The primer sequences are as noted:

508 human tA(IGC) [51-36] CGCTaCCTCTCGCATG  
509 human tV(AAC) [50-36] GGGaCCTTTCGCGTG  
510 human tIle(AAT)[50-36] GCGaCCTTGGCGTTA

511

## 512 **Supplementary Materials**

513 Supplemental Figures 1-2 and Supplemental Table 1 are provided.

514

## 515 **Funding**

516 This work was supported by the Saudi Human Genome Program (FSA), King Salman Center for Disability  
517 Research (FSA), and King Abdulaziz City for Science and Technology Grant 08-MED497-20 to F.S.A.;  
518 National Institutes of Health Grant GM052347 to E.M.P; and a University of Rochester Furth Fund Award  
519 and National Science Foundation CAREER Award 1552126 to D.F..

520

## 521 **Acknowledgements**

522 We thank Mais Hashem for her assistance as a clinical research coordinator; Tarfa Alshiddi, Rana Alomar  
523 and Eman Alobaid from the tissue culture core facility at KFSHRC; Joshua Dewe, Morgan Thomalla and  
524 Michael Haft for preliminary studies; Kyle Swovick, Chen Chen, and Ben Phelan for foci quantification;

525 Kevin Welle and the URM Mass Spectrometry Resource Lab for proteomics; and the Ghaemmaghami  
526 Lab for microscopy resources and discussion. We also thank the participating human subjects for donating  
527 their blood samples for research.

528 **Figure Legends**

529 **Figure 1.** ADAT3-V144M displays aberrant nucleocytoplasmic localization and increased susceptibility to  
530 form cytoplasmic aggregates. (A) Fluorescence microscopy images of GFP alone, GFP-tagged ADAT3-  
531 WT and V144M expressed in HeLa cervical carcinoma cells. Nuclear DNA was stained with Hoechst with  
532 merge on right column. Arrowheads represent cells with >3 cytoplasmic foci of GFP-ADAT3. (B) Fraction  
533 of cells exhibiting GFP-ADAT3 that was either primarily cytoplasmic, similarly distributed between the  
534 cytoplasmic and nucleus, or primarily nuclear. (C) Fold number of cells that exhibited greater than three  
535 cytoplasmic foci of GFP-ADAT3. The fold amount was expressed relative to ADAT3-WT without ADAT2  
536 co-expression where 7% of cells exhibited greater than three cytoplasmic foci. (B) and (C) were repeated  
537 3x with a minimum of 580 cells counted per experiment. (D) Immunoblot of GFP-ADAT3 expression  
538 without or with ADAT2 co-expression.

539

540 **Figure 2.** ADAT3-V144M maintains interaction with ADAT2 but displays increased propensity to self-  
541 associate. (A) Similar levels of either ADAT3-WT or ADAT3-V144M copurify with ADAT2. Immunoblot  
542 for the indicated proteins from input (5%) or Streptactin affinity purifications (10%) from 293T cells  
543 transfected to express the Strep-tag alone (vector) or Strep-tagged ADAT2 with either GFP-ADAT3-WT  
544 or V144M. The relative ADAT3 copurified represents the ratio of GFP-ADAT3 signal present in the eluted  
545 fraction normalized to Strep-ADAT2 signal relative to ADAT3-WT. (B) ADAT3-WT or ADAT3-V144M  
546 copurify with similar levels of ADAT2. Immunoblot for the indicated proteins from input (5%) or  
547 Streptactin affinity purifications (20%) from 293T cells transfected to express ADAT3-Strep-WT or  
548 ADAT3-Strep-V144M without or with His-ADAT2. The relative ADAT2 copurified represents the ratio  
549 of His-ADAT2 signal present in the eluted fraction normalized to ADAT3-Strep signal relative to ADAT3-  
550 WT. (C) Increased self-association of ADAT3-V144M. Immunoblot for the indicated proteins from input  
551 (5%) or Streptactin affinity purifications (20%) from 293T cells transfected to express ADAT3-Strep-WT  
552 or V144M with either GFP-ADAT3-WT or V144M in the absence or presence of ADAT2 coexpression.  
553 (\*) represents ADAT3-Strep signal from previous probing. The % ADAT3 copurified represents the ratio

554 of GFP-ADAT3 signal present in the eluted fraction normalized to Strep-ADAT3 signal relative to ADAT3-  
555 WT. (A-C) were repeated three times with comparable results.

556

557 **Figure 3.** ADAT3-V144M is bound by the HSP60 and TRiC chaperonins. (A) Silver stain of eluted FLAG-  
558 affinity purifications from 293T cells expressing FLAG-tag alone (vector), FLAG-ADAT3-WT or FLAG-  
559 ADAT3-V144M. Arrowhead represents FLAG-ADAT3 and arrow represents a protein that specifically co-  
560 purifies with ADAT3-V144M. (B) Chaperonin proteins identified by LC-MS proteomics specifically in  
561 ADAT3-V144M purifications. ADAT3 peptides are included as comparison. (C-E) Immunoblot for the  
562 indicated proteins from input (5%) or FLAG-affinity purifications (100%) from 293T cells transfected to  
563 express FLAG-ADAT3-WT or V144M without or with His-ADAT2. IP-immunoblots were repeated three  
564 times with comparable results. (\*) in (A) and (D) represents heavy and light chains of the anti-FLAG  
565 antibody used for affinity purification.

566

567 **Figure 4.** ADAT2/3 complexes assembled with ADAT3-V144M exhibit defects in deaminase activity. (A)  
568 Schematic of adenosine deaminase assay for inosine formation using *in vitro* transcribed tRNA-Val-AAC.  
569 (B) 5-fold dilution series of purified ADAT2/3 complexes decreasing from 15 nM used for adenosine  
570 deaminase activity assays. (C, D) Phosphorimager scans of TLC plates of separated nucleoside products  
571 from tRNAs incubated with the indicated buffer or enzymes. The migration of inosine monophosphate  
572 (IMP) and adenosine monophosphate (AMP) are indicated. Adenosine deaminase assays were repeated at  
573 least 2x using independently purified ADAT2/3 enzymes with similar results.

574

575 **Figure 5.** Individuals homozygous for the ADAT3-V144M mutation exhibit defects in adenosine  
576 deaminase activity. (A, B) Pedigrees of patients 1 (P1) and 2 (P2) containing homozygous V144M missense  
577 mutations in the ADAT3 gene. (C) Frontal and side views of individual 09DG00479 (sibling of P1) showing  
578 a prominent forehead, triangular face and strabismus. (D) Immunoblot for the indicated proteins of extracts  
579 from LCLs donated from a wildtype individual and patients 1 and 2 harboring homozygous V144M



580 mutations. (E, F) Representative TLC plates from adenosine deaminase activity assays using the indicated  
581 tRNA substrates with LCL extracts isolated from the wildtype control individual and persons harboring  
582 homozygous V144M mutations. Adenosine deaminase assays were repeated at least 2x with extracts  
583 generated from LCLs grown at different times with similar results.

584

585 **Figure 6.** ID-affected individuals expressing only ADAT3-V144M variant exhibit decreased wobble  
586 inosine modification in tRNA isoacceptors. (A) Sequencing chromatogram analysis of RT-PCR products  
587 amplified from endogenous tRNA-Val-AAC isolated from LCLs of the indicated individuals. The wobble  
588 adenosine/inosine position is highlighted. Inosine is read out as G. (B-D) V144M-LCLs exhibit decreased  
589 inosine modification in tRNA-Val-AAC, Ile-AAU and Leu-AAG. Primer extension analysis with the  
590 indicated oligonucleotide probes against inosine-containing tRNAs in the presence of ddCTP. ‘G<sub>n</sub>’ denotes  
591 read-through product indicative of decreased inosine modification at position 34. ‘I<sub>34</sub>’ represents stop  
592 position if inosine is present. ‘o’ represents the labeled oligonucleotide used for primer extension.

593

594 **Supplemental Figure 1.** ADAT3-V144M displays aberrant nucleocytoplasmic localization and increased  
595 susceptibility to form cytoplasmic aggregates also when tagged on the C-terminus with GFP (ADAT3-  
596 GFP). (A) Fluorescence microscopy images of GFP alone, ADAT3-WT and V144M GFP-tagged expressed  
597 in HeLa cervical carcinoma cells. Nuclear DNA was stained with Hoechst with merge on right column. (B)  
598 Fraction of cells exhibiting ADAT3-GFP that was either primarily cytoplasmic, similarly distributed  
599 between the cytoplasmic and nucleus, or primarily nuclear. (C) Fold number of cells that exhibited greater  
600 than three cytoplasmic foci of GFP-ADAT3. For (B) and (C) a minimum of 615 cells counted per  
601 experiment. (D) Immunoblot of ADAT3-GFP expression without or with ADAT2 co-expression.

602

603 **Supplemental Figure 2.** Individuals homozygous for the ADAT3-V144M mutation exhibit defects in  
604 adenosine deaminase activity relative to wildtype (WT) control LCLs. TLC plates from adenosine  
605 deaminase activity assays using the indicated tRNA substrates with LCL extracts isolated from an

606 additional, unrelated wildtype control (WT-2) individual, the previously-described wildtype control  
607 individual (WT-1) and patients harboring homozygous V144M mutations (P1 and P2).

608

609 References

610

611 1. Maraia, R. J., and Arimbasseri, A. G. (2017) Factors That Shape Eukaryotic tRNAomes:  
612 Processing, Modification and Anticodon-Codon Use. *Biomolecules* **7**

613 2. Agris, P. F., Eruysal, E. R., Narendran, A., Vare, V. Y. P., Vangaveti, S., and Ranganathan, S. V.  
614 (2017) Celebrating wobble decoding: Half a century and still much is new. *RNA Biol*, 1-17

615 3. Torres, A. G., Pineyro, D., Filonava, L., Stracker, T. H., Batlle, E., and Ribas de Pouplana, L.  
616 (2014) A-to-I editing on tRNAs: biochemical, biological and evolutionary implications. *FEBS Lett* **588**,  
617 4279-4286

618 4. Grosjean, H., de Crecy-Lagard, V., and Marck, C. (2010) Deciphering synonymous codons in the  
619 three domains of life: co-evolution with specific tRNA modification enzymes. *FEBS Lett* **584**, 252-264

620 5. Rafels-Ybern, A., Attolini, C. S., and Ribas de Pouplana, L. (2015) Distribution of ADAT-  
621 Dependent Codons in the Human Transcriptome. *Int J Mol Sci* **16**, 17303-17314

622 6. Novoa, E. M., Pavon-Eternod, M., Pan, T., and Ribas de Pouplana, L. (2012) A role for tRNA  
623 modifications in genome structure and codon usage. *Cell* **149**, 202-213

624 7. Wolf, J., Gerber, A. P., and Keller, W. (2002) tadA, an essential tRNA-specific adenosine  
625 deaminase from Escherichia coli. *EMBO J* **21**, 3841-3851

626 8. Gerber, A. P., and Keller, W. (1999) An adenosine deaminase that generates inosine at the  
627 wobble position of tRNAs. *Science* **286**, 1146-1149

628 9. Auxilien, S., Crain, P. F., Trewyn, R. W., and Grosjean, H. (1996) Mechanism, specificity and  
629 general properties of the yeast enzyme catalysing the formation of inosine 34 in the anticodon of transfer  
630 RNA. *J Mol Biol* **262**, 437-458

631 10. Betts, L., Xiang, S., Short, S. A., Wolfenden, R., and Carter, C. W., Jr. (1994) Cytidine  
632 deaminase. The 2.3 Å crystal structure of an enzyme: transition-state analog complex. *J Mol Biol* **235**,  
633 635-656

634 11. Ko, T. P., Lin, J. J., Hu, C. Y., Hsu, Y. H., Wang, A. H., and Liaw, S. H. (2003) Crystal structure  
635 of yeast cytosine deaminase. Insights into enzyme mechanism and evolution. *The Journal of biological  
636 chemistry* **278**, 19111-19117

637 12. Tsutsumi, S., Sugiura, R., Ma, Y., Tokuoka, H., Ohta, K., Ohte, R., Noma, A., Suzuki, T., and  
638 Kuno, T. (2007) Wobble inosine tRNA modification is essential to cell cycle progression in G(1)/S and  
639 G(2)/M transitions in fission yeast. *J Biol Chem* **282**, 33459-33465

- 640 13. Rubio, M. A., Pastar, I., Gaston, K. W., Ragone, F. L., Janzen, C. J., Cross, G. A., Papavasiliou,  
641 F. N., and Alfonzo, J. D. (2007) An adenosine-to-inosine tRNA-editing enzyme that can perform C-to-U  
642 deamination of DNA. *Proc Natl Acad Sci U S A* **104**, 7821-7826
- 643 14. Zhou, W., Karcher, D., and Bock, R. (2014) Identification of enzymes for adenosine-to-inosine  
644 editing and discovery of cytidine-to-uridine editing in nucleus-encoded transfer RNAs of Arabidopsis.  
645 *Plant Physiol* **166**, 1985-1997
- 646 15. Torres, A. G., Pineyro, D., Rodriguez-Escriba, M., Camacho, N., Reina, O., Saint-Leger, A.,  
647 Filonava, L., Batlle, E., and Ribas de Pouplana, L. (2015) Inosine modifications in human tRNAs are  
648 incorporated at the precursor tRNA level. *Nucleic Acids Res* **43**, 5145-5157
- 649 16. Alazami, A. M., Hijazi, H., Al-Dosari, M. S., Shaheen, R., Hashem, A., Aldahmesh, M. A.,  
650 Mohamed, J. Y., Kentab, A., Salih, M. A., Awaji, A., Masoodi, T. A., and Alkuraya, F. S. (2013)  
651 Mutation in ADAT3, encoding adenosine deaminase acting on transfer RNA, causes intellectual disability  
652 and strabismus. *J Med Genet* **50**, 425-430
- 653 17. El-Hattab, A. W., Saleh, M. A., Hashem, A., Al-Owain, M., Asmari, A. A., Rabei, H.,  
654 Abdelraouf, H., Hashem, M., Alazami, A. M., Patel, N., Shaheen, R., Faqeih, E. A., and Alkuraya, F. S.  
655 (2016) ADAT3-related intellectual disability: Further delineation of the phenotype. *Am J Med Genet A*  
656 **170A**, 1142-1147
- 657 18. Anazi, S., Maddirevula, S., Faqeih, E., Alsedairy, H., Alzahrani, F., Shamseldin, H. E., Patel, N.,  
658 Hashem, M., Ibrahim, N., Abdulwahab, F., Ewida, N., Alsaif, H. S., Al Sharif, H., Alamoudi, W., Kentab,  
659 A., Bashiri, F. A., Alnaser, M., AlWadei, A. H., Alfadhel, M., Eyaid, W., Hashem, A., Al Asmari, A.,  
660 Saleh, M. M., AlSaman, A., Alhasan, K. A., Alsughayir, M., Al Shammari, M., Mahmoud, A., Al-  
661 Hassnan, Z. N., Al-Husain, M., Osama Khalil, R., Abd El Meguid, N., Masri, A., Ali, R., Ben-Omran, T.,  
662 El Fishway, P., Hashish, A., Ercan Sencicek, A., State, M., Alazami, A. M., Salih, M. A., Altassan, N.,  
663 Arold, S. T., Abouelhoda, M., Wakil, S. M., Monies, D., Shaheen, R., and Alkuraya, F. S. (2017) Clinical  
664 genomics expands the morbid genome of intellectual disability and offers a high diagnostic yield. *Mol*  
665 *Psychiatry* **22**, 615-624
- 666 19. Monies, D., Abouelhoda, M., AlSayed, M., Alhassnan, Z., Alotaibi, M., Kayyali, H., Al-Owain,  
667 M., Shah, A., Rahbeeni, Z., Al-Muhaizea, M. A., Alzaidan, H. I., Cupler, E., Bohlega, S., Faqeih, E.,  
668 Faden, M., Alyounes, B., Jaroudi, D., Goljan, E., Elbardisy, H., Akilan, A., Albar, R., Aldhalaan, H.,  
669 Gulab, S., Chedrawi, A., Al Saud, B. K., Kurdi, W., Makhseed, N., Alqasim, T., El Khashab, H. Y., Al-  
670 Mousa, H., Alhashem, A., Kanaan, I., Algoufi, T., Alsaleem, K., Basha, T. A., Al-Murshedi, F., Khan, S.,  
671 Al-Kindy, A., Alnemer, M., Al-Hajjar, S., Alyamani, S., Aldhekri, H., Al-Mehaidib, A., Amaout, R.,  
672 Dabbagh, O., Shagrani, M., Broering, D., Tulbah, M., Alqassmi, A., Almugbel, M., AlQuaiz, M.,  
673 Alaman, A., Al-Thihli, K., Sulaiman, R. A., Al-Dekhail, W., Alsaegh, A., Bashiri, F. A., Qari, A.,  
674 Alhomadi, S., Alkuraya, H., Alsebayel, M., Hamad, M. H., Szonyi, L., Abaalkhail, F., Al-Mayouf, S. M.,  
675 Almojalli, H., Alqadi, K. S., Elsiesy, H., Shuaib, T. M., Seidahmed, M. Z., Abosoudah, I., Akleh, H.,  
676 AlGhoniaim, A., Alkharfy, T. M., Al Mutairi, F., Eyaid, W., Alsharbary, A., Sheikh, F. R., Alsohaibani,  
677 F. I., Alsonbul, A., Al Tala, S., Balkhy, S., Bassiouni, R., Alenizi, A. S., Hussein, M. H., Hassan, S.,  
678 Khalil, M., Tabarki, B., Alshahwan, S., Oshi, A., Sabr, Y., Alsaadoun, S., Salih, M. A., Mohamed, S.,  
679 Sultana, H., Tamim, A., El-Haj, M., Alshahrani, S., Bubshait, D. K., Alfadhel, M., Faquih, T., El-  
680 Kalioby, M., Subhani, S., Shah, Z., Moghrabi, N., Meyer, B. F., and Alkuraya, F. S. (2017) The landscape  
681 of genetic diseases in Saudi Arabia based on the first 1000 diagnostic panels and exomes. *Hum Genet*  
682 **136**, 921-939

- 683 20. Abouelhoda, M., Sobahy, T., El-Kalioby, M., Patel, N., Shamseldin, H., Monies, D., Al-Tassan,  
684 N., Ramzan, K., Imtiaz, F., Shaheen, R., and Alkuraya, F. S. (2016) Clinical genomics can facilitate  
685 countrywide estimation of autosomal recessive disease burden. *Genet Med* **18**, 1244-1249
- 686 21. Khan, M., Rafiq, M., Noor, A., Hussain, S., Flores, J., Rupp, V., Vincent, A., Malli, R., Ali, G.,  
687 Khan, F., Ishak, G., Doherty, D., Weksberg, R., Ayub, M., Windpassinger, C., Ibrahim, S., Frye, M.,  
688 Ansar, M., and Vincent, J. (2012) Mutation in NSUN2, which encodes an RNA methyltransferase, causes  
689 autosomal-recessive intellectual disability. *American journal of human genetics* **90**, 856-863
- 690 22. Blanco, S., Dietmann, S., Flores, J. V., Hussain, S., Kutter, C., Humphreys, P., Lukk, M.,  
691 Lombard, P., Treps, L., Popis, M., Kellner, S., Holter, S. M., Garrett, L., Wurst, W., Becker, L.,  
692 Klopstock, T., Fuchs, H., Gailus-Durner, V., Hrabe de Angelis, M., Karadottir, R. T., Helm, M., Ule, J.,  
693 Gleeson, J. G., Odom, D. T., and Frye, M. (2014) Aberrant methylation of tRNAs links cellular stress to  
694 neuro-developmental disorders. *EMBO J*
- 695 23. Shaheen, R., Abdel-Salam, G. M., Guy, M. P., Alomar, R., Abdel-Hamid, M. S., Afifi, H. H.,  
696 Ismail, S. I., Emam, B. A., Phizicky, E. M., and Alkuraya, F. S. (2015) Mutation in WDR4 impairs tRNA  
697 m(7)G46 methylation and causes a distinct form of microcephalic primordial dwarfism. *Genome Biol* **16**,  
698 210
- 699 24. Shaheen, R., Han, L., Faqeih, E., Ewida, N., Alobeid, E., Phizicky, E. M., and Alkuraya, F. S.  
700 (2016) A homozygous truncating mutation in PUS3 expands the role of tRNA modification in normal  
701 cognition. *Hum Genet* **135**, 707-713
- 702 25. Najmabadi, H., Hu, H., Garshasbi, M., Zemojtel, T., Abedini, S., Chen, W., Hosseini, M., Behjati,  
703 F., Haas, S., Jamali, P., Zecha, A., Mohseni, M., Püttmann, L., Vahid, L., Jensen, C., Moheb, L., Bienek,  
704 M., Larti, F., Mueller, I., Weissmann, R., Darvish, H., Wrogemann, K., Hadavi, V., Lipkowitz, B.,  
705 Esmaeeli-Nieh, S., Wiczorek, D., Kariminejad, R., Firouzabadi, S., Cohen, M., Fattahi, Z., Rost, I.,  
706 Mojahedi, F., Hertzberg, C., Dehghan, A., Rajab, A., Banavandi, M., Hoffer, J., Falah, M., Musante, L.,  
707 Kalscheuer, V., Ullmann, R., Kuss, A., Tzschach, A., Kahrizi, K., and Ropers, H. (2011) Deep  
708 sequencing reveals 50 novel genes for recessive cognitive disorders. *Nature* **478**, 57-63
- 709 26. Guy, M. P., Shaw, M., Weiner, C. L., Hobson, L., Stark, Z., Rose, K., Kalscheuer, V. M., Gecz,  
710 J., and Phizicky, E. M. (2015) Defects in tRNA Anticodon Loop 2'-O-Methylation Are Implicated in  
711 Nonsyndromic X-Linked Intellectual Disability due to Mutations in FTSJ1. *Hum Mutat* **36**, 1176-1187
- 712 27. Freude, K., Hoffmann, K., Jensen, L. R., Delatycki, M. B., des Portes, V., Moser, B., Hamel, B.,  
713 van Bokhoven, H., Moraine, C., Fryns, J. P., Chelly, J., Gecz, J., Lenzner, S., Kalscheuer, V. M., and  
714 Ropers, H. H. (2004) Mutations in the FTSJ1 gene coding for a novel S-adenosylmethionine-binding  
715 protein cause nonsyndromic X-linked mental retardation. *Am J Hum Genet* **75**, 305-309
- 716 28. Davarniya, B., Hu, H., Kahrizi, K., Musante, L., Fattahi, Z., Hosseini, M., Maqsood, F.,  
717 Farajollahi, R., Wienker, T. F., Ropers, H. H., and Najmabadi, H. (2015) The Role of a Novel TRMT1  
718 Gene Mutation and Rare GRM1 Gene Defect in Intellectual Disability in Two Azeri Families. *PLoS One*  
719 **10**, e0129631
- 720 29. Abbasi-Moheb, L., Mertel, S., Gonsior, M., Nouri-Vahid, L., Kahrizi, K., Cirak, S., Wiczorek,  
721 D., Motazacker, M., Esmaeeli-Nieh, S., Cremer, K., Weißmann, R., Tzschach, A., Garshasbi, M.,  
722 Abedini, S., Najmabadi, H., Ropers, H., Sigrist, S., and Kuss, A. (2012) Mutations in NSUN2 cause  
723 autosomal-recessive intellectual disability. *American journal of human genetics* **90**, 847-855

- 724 30. Musante, L., and Ropers, H. (2014) Genetics of recessive cognitive disorders. *Trends in genetics* :  
725 *TIG* **30**, 32-39
- 726 31. Haumont, E., Fournier, M., de Henau, S., and Grosjean, H. (1984) Enzymatic conversion of  
727 adenosine to inosine in the wobble position of yeast tRNA<sup>Asp</sup>: the dependence on the anticodon  
728 sequence. *Nucleic Acids Res* **12**, 2705-2715
- 729 32. Schmidt, T. G., Batz, L., Bonet, L., Carl, U., Holzapfel, G., Kiem, K., Matulewicz, K., Niermeier,  
730 D., Schuchardt, I., and Stanar, K. (2013) Development of the Twin-Strep-tag(R) and its application for  
731 purification of recombinant proteins from cell culture supernatants. *Protein Expr Purif* **92**, 54-61
- 732 33. Skjaerven, L., Cuellar, J., Martinez, A., and Valpuesta, J. M. (2015) Dynamics, flexibility, and  
733 allostery in molecular chaperonins. *FEBS Lett* **589**, 2522-2532
- 734 34. Gruber, R., and Horowitz, A. (2016) Allosteric Mechanisms in Chaperonin Machines. *Chem Rev*  
735 **116**, 6588-6606
- 736 35. Saibil, H. (2013) Chaperone machines for protein folding, unfolding and disaggregation. *Nat Rev*  
737 *Mol Cell Biol* **14**, 630-642
- 738 36. Vilasi, S., Carrotta, R., Mangione, M. R., Campanella, C., Librizzi, F., Randazzo, L., Martorana,  
739 V., Marino Gammazza, A., Ortore, M. G., Vilasi, A., Pocsfalvi, G., Burgio, G., Corona, D., Palumbo  
740 Piccionello, A., Zummo, G., Bulone, D., Conway de Macario, E., Macario, A. J., San Biagio, P. L., and  
741 Cappello, F. (2014) Human Hsp60 with its mitochondrial import signal occurs in solution as heptamers  
742 and tetradecamers remarkably stable over a wide range of concentrations. *PLoS One* **9**, e97657
- 743 37. Dalton, K. M., Frydman, J., and Pande, V. S. (2015) The dynamic conformational cycle of the  
744 group I chaperonin C-termini revealed via molecular dynamics simulation. *PLoS one* **10**, e0117724
- 745 38. Grosjean, H., Keith, G., and Droogmans, L. (2004) Detection and quantification of modified  
746 nucleotides in RNA using thin-layer chromatography. *Methods Mol Biol* **265**, 357-391
- 747 39. Ragone, F. L., Spears, J. L., Wohlgamuth-Benedum, J. M., Kreel, N., Papavasiliou, F. N., and  
748 Alfonzo, J. D. (2011) The C-terminal end of the Trypanosoma brucei editing deaminase plays a critical  
749 role in tRNA binding. *RNA* **17**, 1296-1306
- 750 40. Boccaletto, P., Machnicka, M. A., Purta, E., Piatkowski, P., Baginski, B., Wirecki, T. K., de  
751 Crecy-Lagard, V., Ross, R., Limbach, P. A., Kotter, A., Helm, M., and Bujnicki, J. M. (2018)  
752 MODOMICS: a database of RNA modification pathways. 2017 update. *Nucleic Acids Res* **46**, D303-  
753 D307
- 754 41. Ozanick, S., Krecic, A., Andersland, J., and Anderson, J. T. (2005) The bipartite structure of the  
755 tRNA m1A58 methyltransferase from *S. cerevisiae* is conserved in humans. *RNA* **11**, 1281-1290
- 756 42. Motorin, Y., Muller, S., Behm-Ansmant, I., and Branlant, C. (2007) Identification of modified  
757 residues in RNAs by reverse transcription-based methods. *Methods Enzymol* **425**, 21-53
- 758 43. Suzuki, T., Ueda, H., Okada, S., and Sakurai, M. (2015) Transcriptome-wide identification of  
759 adenosine-to-inosine editing using the ICE-seq method. *Nat Protoc* **10**, 715-732

- 760 44. Kawahara, Y. (2012) Quantification of adenosine-to-inosine editing of microRNAs using a  
761 conventional method. *Nat Protoc* **7**, 1426-1437
- 762 45. Spears, J. L., Rubio, M. A., Gaston, K. W., Wywiał, E., Strikoudis, A., Bujnicki, J. M.,  
763 Papavasiliou, F. N., and Alfonzo, J. D. (2011) A single zinc ion is sufficient for an active Trypanosoma  
764 brucei tRNA editing deaminase. *J Biol Chem* **286**, 20366-20374
- 765 46. Saint-Leger, A., Bello, C., Dans, P. D., Torres, A. G., Novoa, E. M., Camacho, N., Orozco, M.,  
766 Kondrashov, F. A., and Ribas de Pouplana, L. (2016) Saturation of recognition elements blocks evolution  
767 of new tRNA identities. *Sci Adv* **2**, e1501860
- 768 47. Delker, R. K., Zhou, Y., Strikoudis, A., Stebbins, C. E., and Papavasiliou, F. N. (2013)  
769 Solubility-based genetic screen identifies RING finger protein 126 as an E3 ligase for activation-induced  
770 cytidine deaminase. *Proc Natl Acad Sci U S A* **110**, 1029-1034
- 771 48. Zauhar, R. J., Colbert, C. L., Morgan, R. S., and Welsh, W. J. (2000) Evidence for a strong  
772 sulfur-aromatic interaction derived from crystallographic data. *Biopolymers* **53**, 233-248
- 773 49. Reid, K., Lindley, P., and Thornton, J. (1985) Sulphur-aromatic interactions in proteins. *FEBS*  
774 *letters* **190**, 209-213
- 775 50. Valley, C. C., Cembran, A., Perlmutter, J. D., Lewis, A. K., Labello, N. P., Gao, J., and Sachs, J.  
776 N. (2012) The methionine-aromatic motif plays a unique role in stabilizing protein structure. *The Journal*  
777 *of biological chemistry* **287**, 34979-34991
- 778 51. Cookson, M. R. (2017) RNA-binding proteins implicated in neurodegenerative diseases. *Wiley*  
779 *Interdiscip Rev RNA* **8**
- 780 52. Van Deerlin, V. M., Leverenz, J. B., Bekris, L. M., Bird, T. D., Yuan, W., Elman, L. B., Clay, D.,  
781 Wood, E. M., Chen-Plotkin, A. S., Martinez-Lage, M., Steinbart, E., McCluskey, L., Grossman, M.,  
782 Neumann, M., Wu, I. L., Yang, W. S., Kalb, R., Galasko, D. R., Montine, T. J., Trojanowski, J. Q., Lee,  
783 V. M., Schellenberg, G. D., and Yu, C. E. (2008) TARDBP mutations in amyotrophic lateral sclerosis  
784 with TDP-43 neuropathology: a genetic and histopathological analysis. *Lancet Neurol* **7**, 409-416
- 785 53. Woerner, A. C., Frottin, F., Hornburg, D., Feng, L. R., Meissner, F., Patra, M., Tatzelt, J., Mann,  
786 M., Winklhofer, K. F., Hartl, F. U., and Hipp, M. S. (2016) Cytoplasmic protein aggregates interfere with  
787 nucleocytoplasmic transport of protein and RNA. *Science* **351**, 173-176
- 788 54. Farrarwell, N. E., Lambert-Smith, I. A., Warraich, S. T., Blair, I. P., Saunders, D. N., Hatters, D.  
789 M., and Yerbury, J. J. (2015) Distinct partitioning of ALS associated TDP-43, FUS and SOD1 mutants  
790 into cellular inclusions. *Sci Rep* **5**, 13416
- 791 55. Conlon, E. G., and Manley, J. L. (2017) RNA-binding proteins in neurodegeneration:  
792 mechanisms in aggregate. *Genes & development* **31**, 1509-1528
- 793 56. Kessler, A. C., Silveira d'Almeida, G., and Alfonzo, J. D. (2017) The role of intracellular  
794 compartmentalization on tRNA processing and modification. *RNA Biol*, 1-13
- 795 57. Blewett, N. H., and Maraia, R. J. (2018) La involvement in tRNA and other RNA processing  
796 events including differences among yeast and other eukaryotes. *Biochim Biophys Acta*

- 797 58. Chatterjee, K., Nostramo, R. T., Wan, Y., and Hopper, A. K. (2017) tRNA dynamics between the  
798 nucleus, cytoplasm and mitochondrial surface: Location, location, location. *Biochim Biophys Acta*
- 799 59. Shaheen, H. H., Horetsky, R. L., Kimball, S. R., Murthi, A., Jefferson, L. S., and Hopper, A. K.  
800 (2007) Retrograde nuclear accumulation of cytoplasmic tRNA in rat hepatoma cells in response to amino  
801 acid deprivation. *Proc Natl Acad Sci U S A* **104**, 8845-8850
- 802 60. Kessler, A. C., Kulkarni, S. S., Paulines, M. J., Rubio, M. A. T., Limbach, P. A., Paris, Z., and  
803 Alfonzo, J. D. (2017) Retrograde nuclear transport from the cytoplasm is required for tRNA(Tyr)  
804 maturation in *T. brucei*. *RNA Biol*, 1-9
- 805 61. Rafels-Ybern, A., Torres, A. G., Grau-Bove, X., Ruiz-Trillo, I., and Ribas de Pouplana, L. (2017)  
806 Codon adaptation to tRNAs with Inosine modification at position 34 is widespread among Eukaryotes  
807 and present in two Bacterial phyla. *RNA Biol*, 1-8
- 808 62. Fu, D., Brophy, J. A., Chan, C. T., Atmore, K. A., Begley, U., Paules, R. S., Dedon, P. C.,  
809 Begley, T. J., and Samson, L. D. (2010) Human AlkB homolog ABH8 Is a tRNA methyltransferase  
810 required for wobble uridine modification and DNA damage survival. *Mol Cell Biol* **30**, 2449-2459
- 811 63. Dewe, J. M., Fuller, B. L., Lentini, J. M., Kellner, S. M., and Fu, D. (2017) TRMT1-Catalyzed  
812 tRNA Modifications Are Required for Redox Homeostasis To Ensure Proper Cellular Proliferation and  
813 Oxidative Stress Survival. *Molecular and cellular biology* **37**
- 814 64. D'Silva, S., Haider, S. J., and Phizicky, E. M. (2011) A domain of the actin binding protein  
815 Abp140 is the yeast methyltransferase responsible for 3-methylcytidine modification in the tRNA anti-  
816 codon loop. *Rna* **17**, 1100-1110
- 817 65. Jackman, J. E., Montange, R. K., Malik, H. S., and Phizicky, E. M. (2003) Identification of the  
818 yeast gene encoding the tRNA m1G methyltransferase responsible for modification at position 9. *Rna* **9**,  
819 574-585  
820

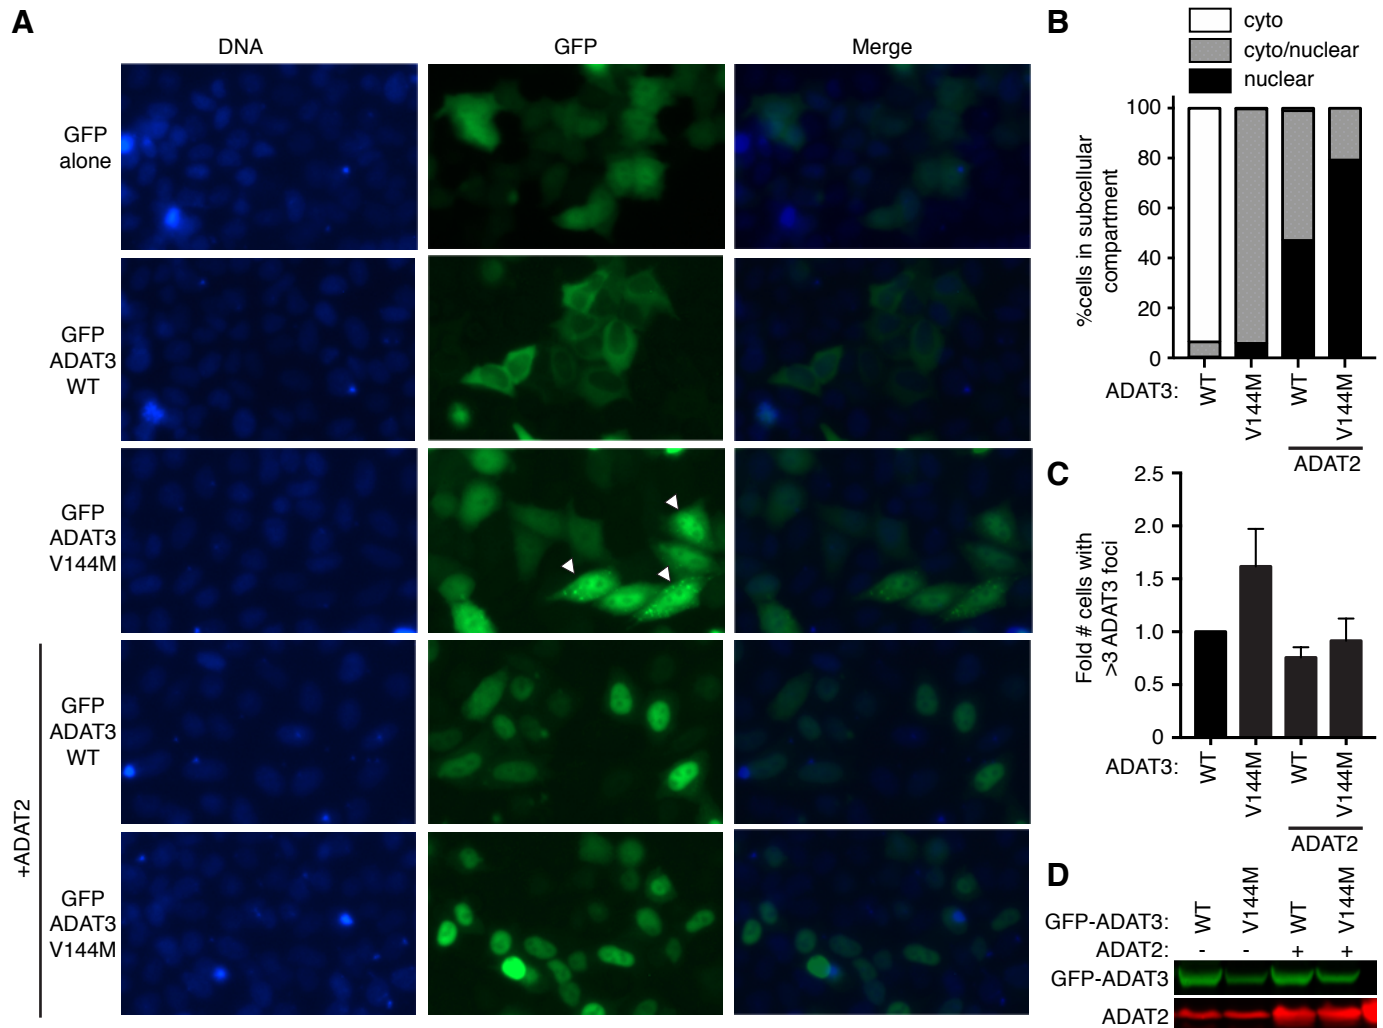

**Figure 1.** ADAT3-V144M displays aberrant nucleocytoplasmic localization and increased susceptibility to form cytoplasmic aggregates. (A) Fluorescence microscopy images of GFP alone, GFP-tagged ADAT3-WT and V144M expressed in HeLa cervical carcinoma cells. Nuclear DNA was stained with Hoechst with merge on right column. Arrowheads represent cells with >3 cytoplasmic foci of GFP-ADAT3. (B) Fraction of cells exhibiting GFP-ADAT3 that was either primarily cytoplasmic, similarly distributed between the cytoplasmic and nucleus, or primarily nuclear. (C) Fold number of cells that exhibited greater than three cytoplasmic foci of GFP-ADAT3. The fold amount was expressed relative to ADAT3-WT without ADAT2 co-expression where 7% of cells exhibited greater than three cytoplasmic foci. (B) and (C) were repeated 3x with a minimum of 580 cells counted per experiment. (D) Immunoblot of GFP-ADAT3 expression without or with ADAT2 co-expression.



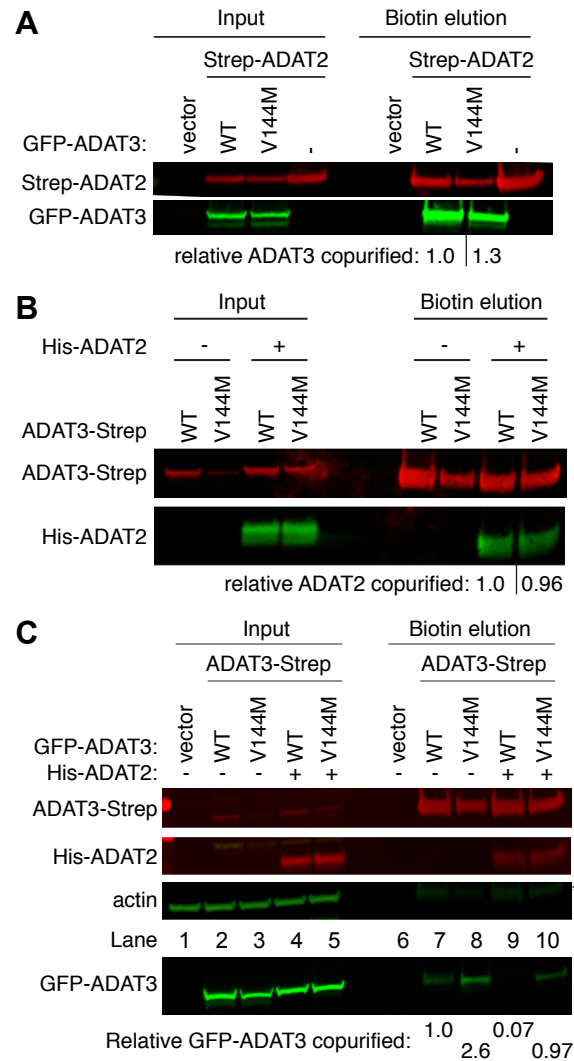

**Figure 2.** ADAT3-V144M maintains interaction with ADAT2 but displays increased propensity to self-associate. (A) Similar levels of either ADAT3-WT or ADAT3-V144M copurify with ADAT2. Immunoblot for the indicated proteins from input (5%) or Streptactin affinity purifications (10%) from 293T cells transfected to express the Strep-tag alone (vector) or Strep-tagged ADAT2 with either GFP-ADAT3-WT or V144M. The relative ADAT3 copurified represents the ratio of GFP-ADAT3 signal present in the eluted fraction normalized to Strep-ADAT2 signal relative to ADAT3-WT. (B) ADAT3-WT or ADAT3-V144M copurify with similar levels of ADAT2. Immunoblot for the indicated proteins from input (5%) or Streptactin affinity purifications (20%) from 293T cells transfected to express ADAT3-Strep-WT or ADAT3-Strep-V144M without or with His-ADAT2. The relative ADAT2 copurified represents the ratio of His-ADAT2 signal present in the eluted fraction normalized to ADAT3-Strep signal relative to ADAT3-WT. (C) Increased self-association of ADAT3-V144M. Immunoblot for the indicated proteins from input (5%) or Streptactin affinity purifications (20%) from 293T cells transfected to express ADAT3-Strep-WT or V144M with either GFP-ADAT3-WT or V144M in the absence or presence of ADAT2 coexpression. (\*) represents ADAT3-Strep signal from previous probing. The % ADAT3 copurified represents the ratio of GFP-ADAT3 signal present in the eluted fraction normalized to Strep-ADAT3 signal relative to ADAT3-WT. (A-C) were repeated three times with comparable results.

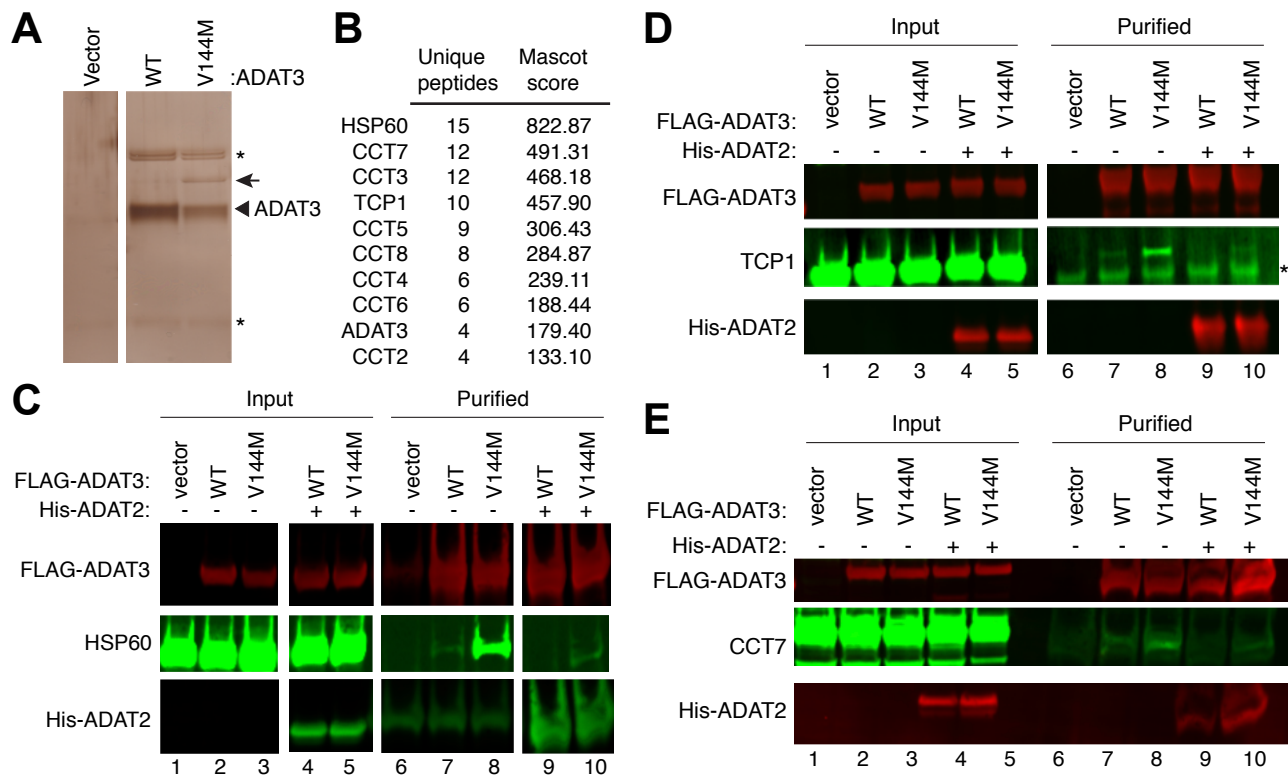

**Figure 3.** ADAT3-V144M is bound by the HSP60 and TRiC chaperonins. (A) Silver stain of eluted FLAG-affinity purifications from 293T cells expressing FLAG-tag alone (vector), FLAG-ADAT3-WT or FLAG-ADAT3-V144M. Arrowhead represents FLAG-ADAT3 and arrow represents a protein that specifically co-purifies with ADAT3-V144M. (B) Chaperonin proteins identified by LC-MS proteomics specifically in ADAT3-V144M purifications. ADAT3 peptides are included as comparison. (C-E) Immunoblot for the indicated proteins from input (5%) or FLAG-affinity purifications (100%) from 293T cells transfected to express FLAG-ADAT3-WT or V144M without or with His-ADAT2. IP-immunoblots were repeated three times with comparable results. (\*) in (A) and (D) represents heavy and light chains of the anti-FLAG antibody used for affinity purification.

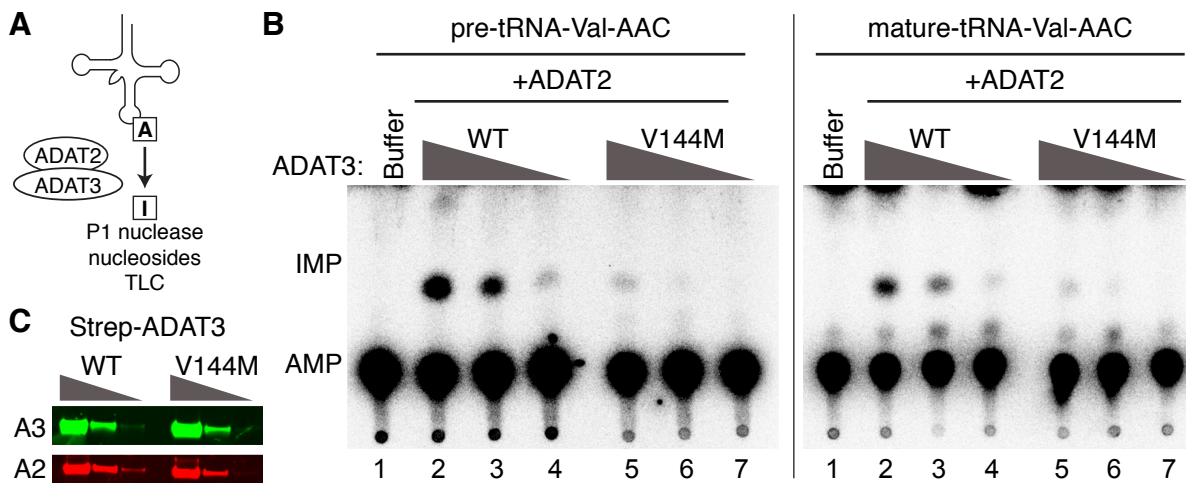

**Figure 4.** ADAT2/3 complexes assembled with ADAT3-V144M exhibit defects in deaminase activity. (A) Schematic of adenosine deaminase assay for inosine formation using in vitro transcribed tRNA-Val-AAC. (B) 5-fold dilution series of purified ADAT2/3 complexes decreasing from 15 nM used for adenosine deaminase activity assays. (C, D) Phosphorimager scans of TLC plates of separated nucleoside products from tRNAs incubated with the indicated buffer or enzymes. The migration of inosine monophosphate (IMP) and adenosine monophosphate (AMP) are indicated. Adenosine deaminase assays were repeated at least 2x using independently purified ADAT2/3 enzymes with similar results.

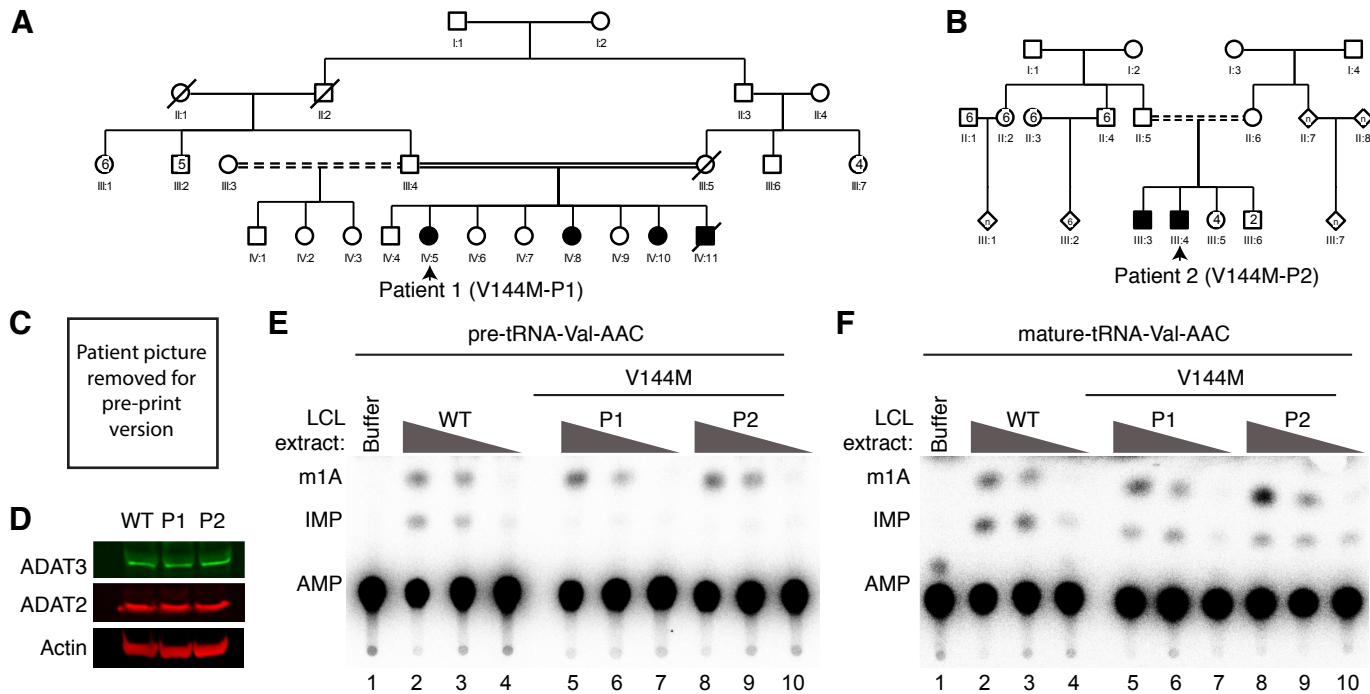

**Figure 5.** Individuals homozygous for the ADAT3-V144M mutation exhibit defects in adenosine deaminase activity. (A, B) Pedigrees of patients 1 (P1) and 2 (P2) containing homozygous V144M missense mutations in the ADAT3 gene. (C) Frontal and side views of individual 09DG00479 (sibling of P1) showing a prominent forehead, triangular face and strabismus. (D) Immunoblot for the indicated proteins of extracts from LCLs donated from a wildtype individual and patients 1 and 2 harboring homozygous V144M mutations. (E, F) Representative TLC plates from adenosine deaminase activity assays using the indicated tRNA substrates with LCL extracts isolated from the wildtype control individual and persons harboring homozygous V144M mutations. Adenosine deaminase assays were repeated at least 2x with extracts generated from LCLs grown at different times with similar results.

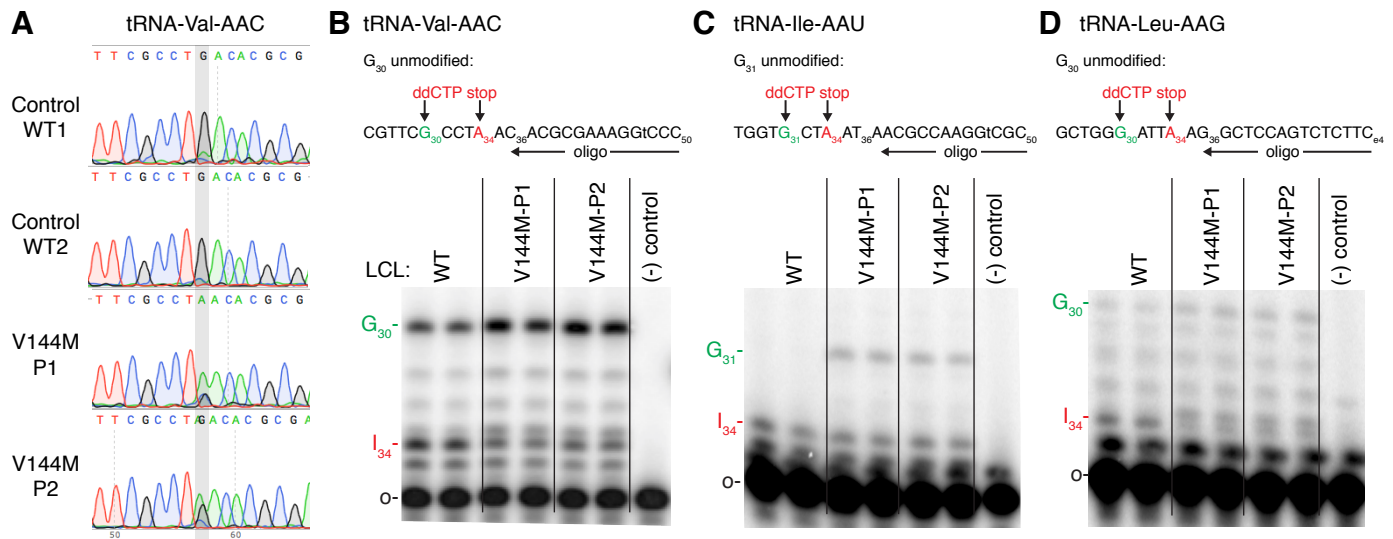

**Figure 6.** ID-affected individuals expressing only ADAT3-V144M variant exhibit decreased wobble inosine modification in tRNA isoacceptors. (A) Sequencing chromatogram analysis of RT-PCR products amplified from endogenous tRNA-Val-AAC isolated from LCLs of the indicated individuals. The wobble adenosine/inosine position is highlighted. Inosine is read out as G. (B-D) V144M-LCLs exhibit decreased inosine modification in tRNA-Val-AAC, Ile-AAU and Leu-AAG. Primer extension analysis with the indicated oligonucleotide probes against inosine-containing tRNAs in the presence of ddCTP. ‘G<sub>n</sub>’ denotes read-through product indicative of decreased inosine modification at position 34. ‘I<sub>34</sub>’ represents stop position if inosine is present. ‘o’ represents the labeled oligonucleotide used for primer extension.

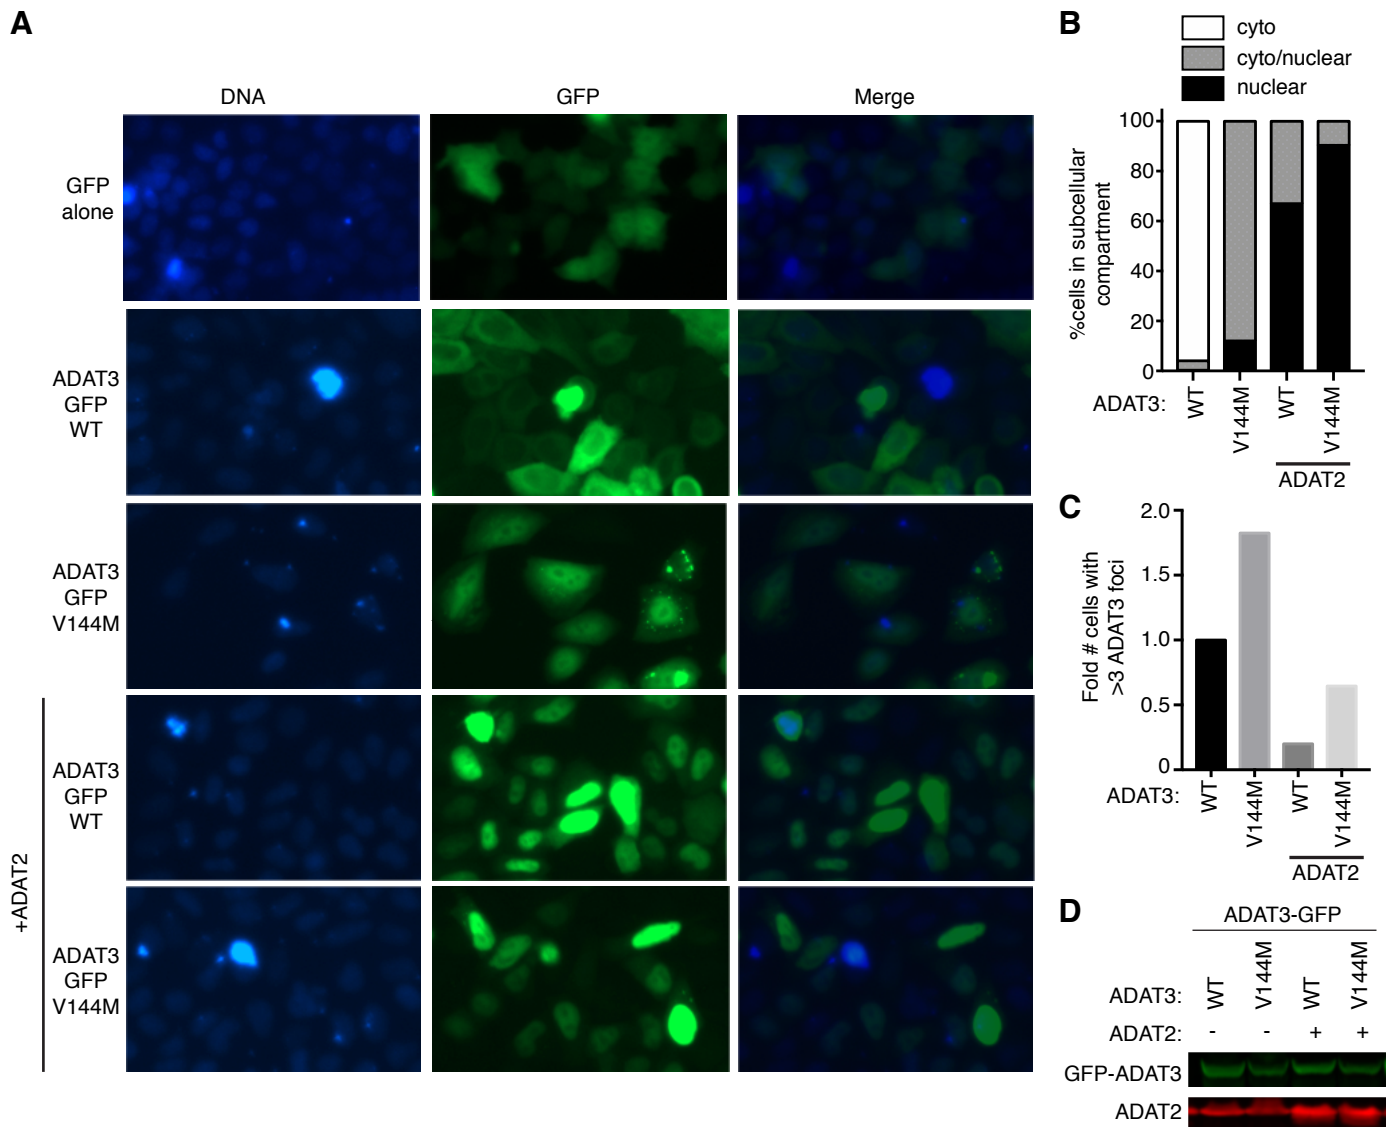

**Supplemental Figure 1.** ADAT3-V144M displays aberrant nucleocytoplasmic localization and increased susceptibility to form cytoplasmic aggregates also when tagged on the C-terminus with GFP (ADAT3-GFP). (A) Fluorescence microscopy images of GFP alone, ADAT3-WT and V144M GFP-tagged expressed in HeLa cervical carcinoma cells. Nuclear DNA was stained with Hoechst with merge on right column. (B) Fraction of cells exhibiting ADAT3-GFP that was either primarily cytoplasmic, similarly distributed between the cytoplasmic and nucleus, or primarily nuclear. (C) Fold number of cells that exhibited greater than three cytoplasmic foci of GFP-ADAT3. For (B) and (C) a minimum of 615 cells counted per experiment. (D) Immunoblot of ADAT3-GFP expression without or with ADAT2 co-expression.

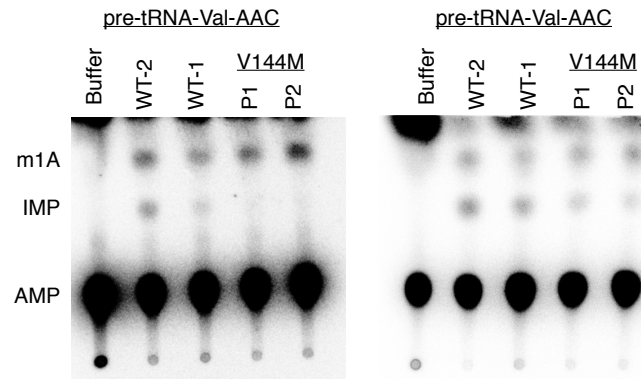

**Supplemental Figure 2.** Individuals homozygous for the ADAT3-V144M mutation exhibit defects in adenosine deaminase activity relative to wildtype (WT) control LCLs. TLC plates from adenosine deaminase activity assays using the indicated tRNA substrates with LCL extracts isolated from an additional, unrelated wildtype control (WT-2) individual, the previously-described wildtype control individual (WT-1) and patients harboring homozygous V144M mutations (P1 and P2).
